# Supplementary material for: Nutritional Strategies in Prediabetes: A Scoping Review of Recent Evidence
Source: MDPI journal article supplement (doi:10.3390/nu12102990), 2020-09-29
Supplement: s1 [file s1]

**Table S2.** Exclusion criteria for this scoping review

|                                                                                                                                                                                                                                                                                                                                                                                                                                                         |
|---------------------------------------------------------------------------------------------------------------------------------------------------------------------------------------------------------------------------------------------------------------------------------------------------------------------------------------------------------------------------------------------------------------------------------------------------------|
| <b>Paper characteristics</b>                                                                                                                                                                                                                                                                                                                                                                                                                            |
| <ul style="list-style-type: none"><li>• Not an original article (i.e. review, meta-analysis, book chapter, conference abstracts, etc.)</li><li>• Trial protocols and study designs</li></ul>                                                                                                                                                                                                                                                            |
| <b>Study characteristics</b>                                                                                                                                                                                                                                                                                                                                                                                                                            |
| <ul style="list-style-type: none"><li>• Not an interventional study</li><li>• Not an original study (follow-up analysis)</li><li>• Not human study</li><li>• Focus on children and adolescents</li><li>• Not prediabetic subjects</li><li>• conducted among a mix of diabetic, prediabetic or normoglycemic subjects but have &lt;70% prediabetic cases</li><li>• Subjects recruited while they were pregnant / gestational diabetes mellitus</li></ul> |
| <b>Intervention characteristics</b>                                                                                                                                                                                                                                                                                                                                                                                                                     |
| <ul style="list-style-type: none"><li>• Pharmacological intervention</li><li>• Not dietary intervention</li><li>• Non-specific diets (i.e. nutritional content not delineated)</li><li>• Use of artificial compounds / compounds extracted from plants not normally consumed as a food item</li><li>• Supplement extracts from non-food source</li><li>• Herbal formulae</li></ul>                                                                      |
