# Supplementary material for: Nutritional Strategies in Prediabetes: A Scoping Review of Recent Evidence
Source: MDPI journal article supplement (doi:10.3390/nu12102990), 2020-09-29
Supplement: s1 [file s1]

**Table S4.** Intervention focus of included studies

| No                             | Focus                          | Definition                                                                                                      | Number of studies | Total sample | References      |
|--------------------------------|--------------------------------|-----------------------------------------------------------------------------------------------------------------|-------------------|--------------|-----------------|
| <b>Low calorie diet</b>        |                                | Restriction of daily caloric intake to below 1,700 kcal/day for men and 1,400 kcal/day for women (upper limits) |                   |              |                 |
| 1                              | Low calorie diet alone         |                                                                                                                 | 4                 | 2557         | [62,67,102,109] |
| 2                              | Low calorie + low fat diet     |                                                                                                                 | 2                 | 46           | [71,99]         |
| <b>Low glycemic index diet</b> |                                | Diets with a glycemic index of 55 or below                                                                      |                   |              |                 |
| 1                              | Non-specific                   |                                                                                                                 | 3                 | 70           | [74,98,101]     |
| 2                              | Dairy/chicken/nuts/whole grain |                                                                                                                 | 1                 | 51           | [105]           |
| 3                              | Resistant starch-rich diet     |                                                                                                                 | 2                 | 132          | [21,61]         |
| <b>Other dietary regimens</b>  |                                |                                                                                                                 |                   |              |                 |
| 1                              | Mediterranean diet             | Diet rich in fresh fruits and vegetables, nuts, fish and olive oil                                              | 2                 | 564          | [49,106]        |
| 2                              | MUFA diet                      | MUFA comprises 28-72% of total energy intake                                                                    | 2                 | 77           | [66,72]         |
| 3                              | Fibre-rich diet                | Dietary fibre intake within WHO recommendations of 27-40g/day                                                   | 2                 | 156          | [24,65]         |
| 4                              | L-dAGEs diet                   | Avoiding food prepared via grilling, broiling, roasting, searing and frying                                     | 1                 | 62           | [51]            |
| 5                              | Low energy breakfast           | 20% of daily energy intake comes from breakfast                                                                 | 1                 | 13           | [107]           |
| 6                              | Four types of carbohydrates    | Comparison of the metabolic response elicited by glucose, trehalose, sucrose and isomaltose ingestion           | 1                 | 10           | [41]            |
| 7                              | Naturopathic whole foods       | Reduction in >1 food type (processed and refined grains, dairy, meat and fat)                                   | 1                 | 45           | [90]            |
| 8                              | Additives                      | Substances used in preparing or garnishing food in order to improve its taste                                   | 2                 | 38           | [50,63]         |
| 9                              | Meal patterns                  | Consumption of meals based on the time and frequency of intake during the day                                   | 2                 | 59           | [64,86]         |

|                                   |                                                                   |                                                                                                             |      |                     |
|-----------------------------------|-------------------------------------------------------------------|-------------------------------------------------------------------------------------------------------------|------|---------------------|
| <b>Diet and physical activity</b> |                                                                   | A combined lifestyle intervention involving both dietary changes and modulation of physical activity levels |      |                     |
| 1                                 | Low carbohydrate + low fat + high fibre intake + exercise         | 6                                                                                                           | 1987 | [22,26,29,38,40,88] |
| 2                                 | Low calories + exercise                                           | 1                                                                                                           | 23   | [75]                |
| 3                                 | low calories + low fat + exercise                                 | 1                                                                                                           | 76   | [84]                |
| 4                                 | High vegetable intake and low alcohol and sugar intake + exercise | 2                                                                                                           | 1027 | [30,34]             |
| 5                                 | Low fat intake + low alcohol intake + exercise                    | 1                                                                                                           | 304  | [27]                |
| <hr/>                             |                                                                   |                                                                                                             |      |                     |
| <b>Specific Food/ Food Groups</b> |                                                                   |                                                                                                             |      |                     |
| <b>Grains</b>                     |                                                                   | Small, hard seeds commonly consumed as staple foods                                                         |      |                     |
| 1                                 | Whole grains diet                                                 | 5                                                                                                           | 298  | [19,23,56,57,77]    |
| 2                                 | Flaxseed                                                          | 2                                                                                                           | 36   | [76,85]             |
| 3                                 | Brown rice                                                        | 2                                                                                                           | 160  | [32,87]             |
| 4                                 | Quinoa                                                            | 1                                                                                                           | 29   | [43]                |
| 5                                 | Barley flake                                                      | 1                                                                                                           | 100  | [28]                |
| 6                                 | Cereal fibre                                                      | 1                                                                                                           | 117  | [58]                |
| 7                                 | Foxtail millet                                                    | 1                                                                                                           | 70   | [31]                |
| <hr/>                             |                                                                   |                                                                                                             |      |                     |
| <b>Plant-based</b>                |                                                                   | Foods directly derived from plants and fungi                                                                |      |                     |
| 1                                 | Berries                                                           | 3                                                                                                           | 94   | [95,96,100]         |
| 2                                 | Kimchi                                                            | 1                                                                                                           | 21   | [17]                |
| 3                                 | Natto and viscous vegetables                                      | 1                                                                                                           | 11   | [25]                |
| 4                                 | UVB-treated mushroom                                              | 1                                                                                                           | 43   | [82]                |

|                               |                                               |                                                                                                                                                    |   |      |                              |
|-------------------------------|-----------------------------------------------|----------------------------------------------------------------------------------------------------------------------------------------------------|---|------|------------------------------|
| 5                             | Kiwi                                          |                                                                                                                                                    | 1 | 26   | [108]                        |
| 6                             | Soybean leaf extract                          |                                                                                                                                                    | 1 | 45   | [18]                         |
| 7                             | Curcumin                                      |                                                                                                                                                    | 1 | 240  | [33]                         |
| <b>Nuts and protein-based</b> |                                               | Foods that serve as common sources of protein for various populations                                                                              |   |      |                              |
| 1                             | Milk                                          |                                                                                                                                                    | 3 | 66   | [60,79,81]                   |
| 2                             | Soy protein                                   |                                                                                                                                                    | 3 | 264  | [20,35,59]                   |
| 3                             | High protein diet                             |                                                                                                                                                    | 3 | 58   | [93,110,111]                 |
| 4                             | Eggs                                          |                                                                                                                                                    | 2 | 40   | [78,80]                      |
| 5                             | Fatty fish, lean fish and Camelina sativa oil |                                                                                                                                                    | 2 | 151  | [54,55]                      |
| 6                             | Pistachio                                     |                                                                                                                                                    | 5 | 240  | [44,45,46,47,48]             |
| 7                             | Almond                                        |                                                                                                                                                    | 1 | 65   | [89]                         |
| <b>Nutrient supplements</b>   |                                               | Products taken orally that contain a dietary ingredient which can be used to supplement a daily diet in hopes of providing a physiological benefit |   |      |                              |
| 1                             | Vitamin D                                     |                                                                                                                                                    | 9 | 1232 | [36,37,42,68,69,83,91,92,94] |
| 2                             | Thiamine                                      |                                                                                                                                                    | 2 | 24   | 103,104]                     |
| 3                             | L-arginine                                    |                                                                                                                                                    | 2 | 166  | [52,53]                      |
| 4                             | Inulin supplementation                        |                                                                                                                                                    | 1 | 18   | [70]                         |
| 5                             | Chromium                                      |                                                                                                                                                    | 1 | 60   | [97]                         |
| 6                             | Galactooligosaccharides                       |                                                                                                                                                    | 1 | 44   | [39]                         |
| 7                             | Betaine                                       |                                                                                                                                                    | 1 | 27   | [73]                         |

L-dAGEs, low advanced glycation end products; MUFA, mono-unsaturated fatty acid; UVB, ultraviolet B; WHO, World Health Organization
