# Supplementary material for: Nutritional Strategies in Prediabetes: A Scoping Review of Recent Evidence
Source: MDPI journal article supplement (doi:10.3390/nu12102990), 2020-09-29
Supplement: s1 [file s1]

**Table S1.** Search strategy employed for Ovid MEDLINE.

| No                                                              | Query                                                 | Results |
|-----------------------------------------------------------------|-------------------------------------------------------|---------|
| 1                                                               | prediabetes.mp or Prediabetic State/                  | 8078    |
| 2                                                               | impaired glucose tolerance.mp or Glucose Intolerance/ | 14804   |
| 3                                                               | 1 or 2                                                | 21739   |
| 4                                                               | diet.mp or Diet/                                      | 421301  |
| 5                                                               | nutrition.mp                                          | 203310  |
| 6                                                               | 4 or 5                                                | 573581  |
| 7                                                               | 3 and 6                                               | 3850    |
| 8                                                               | Limit 7 to “all adults (19 plus years)”               | 1416    |
| 9                                                               | Limit 8 to last 10 years                              | 829     |
| 10                                                              | Limit 9 to clinical trial                             | 286     |
| <sup>a</sup> Comparable strategy were used with other databases |                                                       |         |
| <sup>b</sup> as of 27 <sup>th</sup> April 2020                  |                                                       |         |
