# Supplementary material for: Nutritional Strategies in Prediabetes: A Scoping Review of Recent Evidence
Source: MDPI journal article supplement (doi:10.3390/nu12102990), 2020-09-29
Supplement: s1 [file s1]

Table S5. Outcomes of included studies

| No            | Outcome                                                                                            | Number of studies | Total sample | Studies with significant outcomes |      | References                                                                                                                                                                                            |
|---------------|----------------------------------------------------------------------------------------------------|-------------------|--------------|-----------------------------------|------|-------------------------------------------------------------------------------------------------------------------------------------------------------------------------------------------------------|
|               |                                                                                                    |                   |              | No                                | %    |                                                                                                                                                                                                       |
| General       |                                                                                                    |                   |              |                                   |      |                                                                                                                                                                                                       |
| 1             | Progression to diabetes / remission of prediabetes                                                 | 14                | 3472         | 8                                 | 57.1 | [22*,26*,27*,29,33*,34*,36*,53*,55,58,65,67,69,93*]                                                                                                                                                   |
| 2             | Risk of conversion to diabetes (Diabetes Risk Score, COX proportional hazards regression analysis) | 2                 | 538          | 2                                 | 100  | [49*,84*]                                                                                                                                                                                             |
| 3             | Physical performance / aerobic fitness (VO <sub>2</sub> max) / physical activity                   | 10                | 939          | 7                                 | 70   | [27*,29*,40*,65,71*,74*,88,98*,106,111*]                                                                                                                                                              |
| 4             | Eating behaviour / Dietary intake                                                                  | 7                 | 1841         | 7                                 | 100  | [22*,27*,34*,65*,88*,90*,106*]                                                                                                                                                                        |
| Anthropometry |                                                                                                    |                   |              |                                   |      |                                                                                                                                                                                                       |
| 1             | Weight and/or BMI                                                                                  | 52                | 7458         | 30                                | 57.7 | [17*,18,19,20,22*,24*,25,26*,27*,29*,31*,32*,33*,35,36,39,40*,43*,51,58*,59*,61*,65*,67,68,69,71*,73,74*,77*,84*,85,87*,88*,89,90*,91,93*,96,97,98*,99*,100,101*,102*,103,104,106,108,109*,110*,111*] |
| 2             | Waist and hip circumference / waist-to-hip ratio                                                   | 32                | 5483         | 17                                | 53.1 | [17*,18*,19,20,24*,26*,27,31,32*,33*,36,38*,58*,61*,62*,65,67,69,73,82,84*,87*,88*,89,97,99,100,101*,102*,106,108*,109*]                                                                              |
| 3             | Blood pressure                                                                                     | 31                | 6186         | 16                                | 51.6 | [17*,18,19,20,22,26,31*,32*,36,38*,40*,51,58,62*,65,67,68,73,86*,87*,88*,89,93*,96,97,98*,99,100,102*,104*,108*,109*,111*]                                                                            |
| 4             | Total fat mass, fat-free mass and/or percent body fat                                              | 22                | 3231         | 15                                | 68.2 | [17*,18*,20,24,29*,31,39,58,67*,69*,71*,74*,77*,93*,96,98*,99,101*,102*,109*,110*,111*]                                                                                                               |

---

**Glucose & glucose-related parameters**

|    |                                                                                    |    |      |    |      |                                                                                                                                                                                                                                                                                                          |
|----|------------------------------------------------------------------------------------|----|------|----|------|----------------------------------------------------------------------------------------------------------------------------------------------------------------------------------------------------------------------------------------------------------------------------------------------------------|
| 1  | Plasma glucose (fasting plasma glucose, 2hPG, AUC glucose)                         | 79 | 8631 | 48 | 60.8 | [17*,18*,19*,20*,21*,23*,24*,25*,26*,27*,28*,29,31*,32*,33*,35,36,37*,38*,39,40*,41*,42,43,44*,49*,50*,51,52*,55,56,57*,58*,59*,60*,61*,62*,63,64*,65*,67,68,69,71,72,73,74*,76*,77,78*,79*,81*,82,84,85*,86,87,88*,89,90*,91,92,93*,94,95,96,97,98*,99,100,101,102*,103*,105*,107*,108*,109*,110*,111*] |
| 2  | HbA1c                                                                              | 41 | 6066 | 24 | 58.5 | [17*,18*,19*,20,23*,24*,25,26,28*,29*,32*,33*,37,38*,39,40,42*,43*,51,58*,60*,64*,68*,69,73,82,83*,84*,87,89,90*,91*,92*,93*,94,97,98,101, 106,108*,109*]                                                                                                                                                |
| 3  | Serum insulin (fasting insulin, AUC insulin)                                       | 68 | 7107 | 42 | 61.8 | [17*,18,19*,20,21*,23*,24,25*,27,28*,29,31,33*,35,36*,37,39,41*,42,44,49,50*,52,53*,55,56,57,58*,59*,60,61,62*,63*,64*,68*,69,71*,72,73*,74*,76*,77*,78*,79*,81*,82,85*,86*,87*,89*,90*,91,92*,93*,94*,95*,96,97,98*,99*,100,101*,103*,105*,107*,108,109*,110*]                                          |
| 4  | Insulin resistance (HOMA-IR)                                                       | 41 | 5899 | 26 | 63.4 | [17*,18*,19*,21*,23*,24*,25,28*,31*,33*,35,36*,37,39,42,44*,49*,53*,56,57,58*,59*,60,61,62*,64,68,76*,82,85*,86*,87*,89*,91,93*,94,97,101*,103*,109*,110*]                                                                                                                                               |
| 5  | Pancreatic $\beta$ -cell function (HOMA-B, insulinogenic index, disposition index) | 20 | 1922 | 12 | 60   | [17*,33*,35,37,42*,49*,53*,55,56*,57,69,72,74*,77*,86*,89*,91,92*,94,101*]                                                                                                                                                                                                                               |
| 6  | Insulin sensitivity (Matsuda index, ISI, QUICKI, Cederholm index)                  | 29 | 2394 | 20 | 69.0 | [17*,25*,27*,29*,35,37*,39,42,49*,52*,55,56*,57,58*,60,69,72*,73*,74*,86*,91,92,93*,94*,96*,98*,99*,100*,101*]                                                                                                                                                                                           |
| 7  | C-peptide                                                                          | 18 | 3802 | 12 | 66.7 | [19*,24*,31,33*,45,53*,58*,68,72,73,77*,94*,98*,99,100*,105*,107*,109*]                                                                                                                                                                                                                                  |
| 8  | Glucagon concentration                                                             | 2  | 505  | 1  | 50   | [49*,72]                                                                                                                                                                                                                                                                                                 |
| 9  | Glycated serum protein                                                             | 1  | 180  | 0  | 0    | [35]                                                                                                                                                                                                                                                                                                     |
| 10 | Proinsulin                                                                         | 1  | 240  | 0  | 0    | [33]                                                                                                                                                                                                                                                                                                     |
| 11 | Glucose effectiveness                                                              | 2  | 150  | 2  | 100  | [58*,74*]                                                                                                                                                                                                                                                                                                |

---

**Other blood parameters****Lipid-related parameters**

|   |                                                            |    |      |    |      |                                                                                                                                                                                                                  |
|---|------------------------------------------------------------|----|------|----|------|------------------------------------------------------------------------------------------------------------------------------------------------------------------------------------------------------------------|
| 1 | Serum lipid profile (total, LDL- and HDL-cholesterol; TAG) | 55 | 7165 | 34 | 61.8 | [18*,19,20,22,23,25*,26*,28*,29,31*,32*,38*,39,40*,41,45,46*,50*,51*,55*,57*,61*,62*,63*,64,65*,67,68*,69*,72,73*,78,79,81,82*,84*,86*,87,88*,89*,90*,93*,95,96,97,98*,99*,100,101*,102*,104,105*,106*,108,109*] |
|---|------------------------------------------------------------|----|------|----|------|------------------------------------------------------------------------------------------------------------------------------------------------------------------------------------------------------------------|

|   |                                                                                                                 |    |      |   |      |                                          |
|---|-----------------------------------------------------------------------------------------------------------------|----|------|---|------|------------------------------------------|
| 2 | Free fatty acid (including PUFA)                                                                                | 11 | 1097 | 6 | 54.5 | [19,20,29,39,40*,41*,49*,57*,74*,76*,99] |
| 3 | Apolipoprotein A & B                                                                                            | 8  | 938  | 6 | 75   | [20,28*,31*,50*,51*,55*,68*,69]          |
| 4 | Markers of oxidative stress to lipids (Plasma malondialdehyde, plasma 8-iso-PGF2 $\alpha$ and arachidonic acid) | 8  | 376  | 8 | 100  | [19*,23*,78*,79*,80*,81*,86*,87*]        |
| 5 | Free glycerol                                                                                                   | 1  | 44   | 0 | 0    | [39]                                     |
| 6 | Plasma phospholipid fatty acids                                                                                 | 1  | 72   | 1 | 100  | [54*]                                    |
| 7 | Thiobarbituric acid reactive substance                                                                          | 1  | 11   | 1 | 100  | [85*]                                    |
| 8 | Plasma Lp-PLA2 activity                                                                                         | 1  | 80   | 1 | 100  | [23*]                                    |

#### Hormones

|    |                             |    |     |   |      |                                           |
|----|-----------------------------|----|-----|---|------|-------------------------------------------|
| 1  | Adiponectin                 | 12 | 670 | 2 | 16.7 | [24,25,31,33*,45,66,76,87,93*,99,100,108] |
| 2  | Leptin                      | 9  | 471 | 3 | 33.3 | [25,31*,39,45,58*,66,87,99*,108]          |
| 3  | GLP-1                       | 6  | 224 | 4 | 66.7 | [31,39,45*,50*,77*,107*]                  |
| 4  | GIP                         | 3  | 88  | 1 | 33.3 | [45,77,98*]                               |
| 5  | Ghrelin                     | 2  | 39  | 1 | 50   | [77*,108]                                 |
| 6  | Cortisol                    | 2  | 39  | 0 | 0    | [73,86]                                   |
| 7  | IGF-1                       | 1  | 27  | 0 | 0    | [73]                                      |
| 8  | Parathyroid hormone         | 4  | 687 | 3 | 75   | [68*,69*,82,94*]                          |
| 9  | Cholecystokinin             | 2  | 43  | 2 | 100  | [78*,79*]                                 |
| 10 | Peptide YY                  | 2  | 57  | 0 | 0    | [39,77]                                   |
| 11 | Thyroid-stimulating hormone | 1  | 27  | 0 | 0    | [73]                                      |
| 12 | Fibroblast growth factor 19 | 1  | 27  | 0 | 0    | [73]                                      |

#### Vitamins

|   |             |   |    |   |   |      |
|---|-------------|---|----|---|---|------|
| 1 | Vitamin B12 | 1 | 27 | 0 | 0 | [73] |
|---|-------------|---|----|---|---|------|

|   |                                                           |   |      |   |      |                                      |
|---|-----------------------------------------------------------|---|------|---|------|--------------------------------------|
| 2 | Thiamine status, RBC thiamine pyrophosphate               | 2 | 24   | 1 | 50   | [103*,104,]                          |
| 3 | Plasma antioxidants (vitamin C, E, carotenoids)           | 3 | 91   | 3 | 100  | [80*,90*,108*]                       |
| 4 | Serum vitamin D and its metabolites (25OHD,25OHD2,25OHD3) | 9 | 1245 | 8 | 88.9 | [36*,37*,38*,68*,69*,82,83*,92*,94*] |
| 5 | Folate                                                    | 1 | 27   | 0 | 0    | [73]                                 |

#### Liver-related parameters

|   |                                                                                                                        |   |      |   |      |                            |
|---|------------------------------------------------------------------------------------------------------------------------|---|------|---|------|----------------------------|
| 1 | Liver function (bilirubin, plasma ALT, AST, GGT, ALP)                                                                  | 6 | 2907 | 6 | 100  | [18*,27*,29*,67*,73*,109*] |
| 2 | Clotting factors (platelet count, fibrinogen, tissue factor, PAI-1, vWF)                                               | 3 | 226  | 2 | 66.7 | [45*,56*,100]              |
| 3 | Plasma trimethylamine N-oxide and trimethylamine moieties (choline, L-carnitine, betaine, and $\gamma$ -butyrobetaine) | 1 | 18   | 0 | 0    | [70]                       |

#### Blood tests

|   |                                                                                        |    |      |               |                             |                                                               |
|---|----------------------------------------------------------------------------------------|----|------|---------------|-----------------------------|---------------------------------------------------------------|
| 1 | CRP / hsCRP                                                                            | 17 | 3642 | 6             | 35.3                        | [19,51*,55,56*,58*,66,67,68,76,80,86,90*,96,98*,104,108,109*] |
| 2 | Inflammatory markers (IL-6, IL-8, TNF- $\alpha$ , ox-LDL and others)                   | 16 | 797  | <del>57</del> | <del>43.8</del> <u>31.3</u> | [19*,31*,39,45*,55,56*,66*,76,80,85,86,87,93*,95*,96,100]     |
| 3 | Blood count (hematocrit, leukocyte count)                                              | 2  | 144  | 1             | 50                          | [58*,73]                                                      |
| 4 | Renal function (creatinine, eGFR, uric acid, BUN, electrolytes, Urea-creatinine ratio) | 5  | 610  | 2             | 40                          | [68,73*,97,103,111*]                                          |
| 5 | Serum calcium                                                                          | 6  | 876  | 0             | 0                           | [36,68,69,73,82,94]                                           |

|                                   |                                                                                                         |   |     |   |     |               |
|-----------------------------------|---------------------------------------------------------------------------------------------------------|---|-----|---|-----|---------------|
| 6                                 | Monocyte chemoattractant protein 1                                                                      | 1 | 32  | 0 | 0   | [96]          |
| <b>Enzymes</b>                    |                                                                                                         |   |     |   |     |               |
| 1                                 | DPP-4 activity                                                                                          | 1 | 30  | 1 | 100 | [50*]         |
| 2                                 | Plasma superoxide dismutase activity                                                                    | 1 | 85  | 0 | 0   | [21]          |
| 3                                 | Peripheral blood mononuclear cells enzyme activity (TNF- $\alpha$ , IL-6, IL-1, IL-1 $\beta$ , Lp-PLA2) | 2 | 179 | 2 | 100 | [19*,23*]     |
| <b>Carbohydrates and proteins</b> |                                                                                                         |   |     |   |     |               |
| 1                                 | Endogenous secretory soluble receptor for advanced glycation end products                               | 2 | 116 | 0 | 0   | [45,51]       |
| 2                                 | Fructosamine                                                                                            | 3 | 106 | 0 | 0   | [25,31,76]    |
| 3                                 | Arginine                                                                                                | 3 | 64  | 3 | 100 | [52*,80*,81*] |
| 4                                 | 1,5-Anhydroglucitol                                                                                     | 1 | 11  | 0 | 0   | [25]          |
| 5                                 | Serum Advanced Glycation End products                                                                   | 1 | 100 | 1 | 100 | [87*]         |
| 6                                 | Plasma methylglyoxal                                                                                    | 2 | 43  | 1 | 50  | [78,79*]      |
| <b>Genetics</b>                   |                                                                                                         |   |     |   |     |               |
| 1                                 | DNA damage, leucocyte telomere length and gene expression                                               | 2 | 83  | 2 | 100 | [44*,66*]     |
| 2                                 | MicroRNAs                                                                                               | 2 | 91  | 2 | 100 | [48*,83*]     |
| 3                                 | Cyclic guanosine monophosphate level                                                                    | 1 | 22  | 1 | 100 | [52*]         |
| <b>Others</b>                     |                                                                                                         |   |     |   |     |               |
| 1                                 | Nitric oxide and metabolites                                                                            | 3 | 64  | 3 | 100 | [52*,80*,81*] |

|   |                                                  |   |     |   |     |        |
|---|--------------------------------------------------|---|-----|---|-----|--------|
| 2 | Plasma vasoconstrictors<br>(Ang-II and ET-1)     | 1 | 20  | 1 | 100 | [80*]  |
| 3 | Phenolic bioavailability                         | 1 | 41  | 1 | 100 | [100*] |
| 4 | E-selectin                                       | 1 | 131 | 1 | 100 | [56*]  |
| 5 | Plasma anthocyanins and<br>their bioavailability | 1 | 21  | 1 | 100 | [95*]  |

#### Urine parameters

|   |                                                                                                               |   |     |   |     |               |
|---|---------------------------------------------------------------------------------------------------------------|---|-----|---|-----|---------------|
| 1 | Urinary prostanoids                                                                                           | 3 | 256 | 3 | 100 | [19*,21*,54*] |
| 2 | Urinary metabolites (e.g.<br>hippurate, p-cresol sulfate,<br>cis-aconitate,<br>dimethylamine, U9.365,<br>MHP) | 1 | 39  | 1 | 100 | [47*]         |
| 3 | Urine volume, urinary<br>creatinine clearance, urine<br>albumin, microalbumin                                 | 2 | 67  | 1 | 50  | [97,111*]     |
| 4 | Urinary ketone bodies                                                                                         | 1 | 192 | 1 | 100 | [67*]         |

#### More specific parameters

##### General

|   |                                               |   |    |   |     |               |
|---|-----------------------------------------------|---|----|---|-----|---------------|
| 1 | Satiation and fullness<br>degree, appetite    | 3 | 88 | 3 | 100 | [43*,64*,86*] |
| 2 | Energy expenditure and<br>substrate oxidation | 2 | 54 | 1 | 50  | [39,41*]      |

##### Gastrointestinal system-related

|   |                                 |   |    |   |    |           |
|---|---------------------------------|---|----|---|----|-----------|
| 1 | Fecal short-chain fatty acid    | 1 | 44 | 0 | 0  | [39]      |
| 2 | Fecal microbiota<br>composition | 2 | 70 | 1 | 50 | [39*,108] |

##### Hepatorenal system-related

|   |                     |   |     |   |      |              |
|---|---------------------|---|-----|---|------|--------------|
| 1 | Hepatic fat content | 3 | 185 | 2 | 66.7 | [29*,72*,73] |
|---|---------------------|---|-----|---|------|--------------|

|   |                                                           |   |    |   |     |       |
|---|-----------------------------------------------------------|---|----|---|-----|-------|
| 2 | Hepatic glucose production and hepatic insulin resistance | 1 | 23 | 1 | 100 | [75*] |
| 3 | Liver radiodensity and volume                             | 1 | 15 | 1 | 100 | [99*] |

#### Cardiovascular system-related

|   |                                                                                                        |    |     |   |     |                                       |
|---|--------------------------------------------------------------------------------------------------------|----|-----|---|-----|---------------------------------------|
| 1 | Intima thickness                                                                                       | 1  | 62  | 1 | 100 | [51*]                                 |
| 2 | Endothelial function (Arterial stiffness / Brachial artery flow-mediated dilation / Muscle blood flow) | 10 | 387 | 6 | 60  | [51,52*,56*,63*,73,78*,79*,81*,86,97] |
| 3 | Endothelial function by number of CFU-EPCs                                                             | 1  | 144 | 1 | 100 | [53*]                                 |
| 4 | Left ventricular volume and function                                                                   | 1  | 15  | 1 | 100 | [99*]                                 |
| 5 | Incidence of microvascular complications                                                               | 1  | 542 | 1 | 100 | [30*]                                 |

#### Nervous system-related

|   |                      |   |    |   |   |       |
|---|----------------------|---|----|---|---|-------|
| 1 | Brain reactivity     | 1 | 27 | 0 | 0 | [110] |
| 2 | Thermogenic response | 1 | 10 | 0 | 0 | [41]  |

#### Others

|   |                      |   |      |   |     |        |
|---|----------------------|---|------|---|-----|--------|
| 1 | Bone mineral density | 1 | 2224 | 1 | 100 | [109*] |
|---|----------------------|---|------|---|-----|--------|

\* demonstrates significant ( $p < 0.05$ ) improvement

25OHD, 25-hydroxyvitamin D; 2hPG, 2-h postprandial glucose; 8-iso-PGF $2\alpha$ , 8-iso-prostaglandin F $2\alpha$ ; ALP, alkaline phosphatase; ALT, alanine aminotransferase; AST, aspartate aminotransferase; AUC, area under the curve; Ang-II, angiotensin II; BMI, body mass index; BUN, blood urea nitrogen; CFU-EPCs, colony forming units of endothelial progenitor cells; CRP, C-reactive protein; DNA, deoxyribonucleic acid; DPP-4, dipeptidyl peptidase-4; ET-1, endothelin 1; GGT, gamma-glutamyl transferase; GIP, gastric inhibitory polypeptide; GLP-1, glucagon-like peptide-1; HDL, high-density lipoprotein; HOMA-B, homeostasis model assessment of  $\beta$ -cell function; HOMA-IR, homeostasis model assessment of insulin resistance; HbA1c, glycosylated hemoglobin; IGF-1, insulin-like growth factor 1; IL, interleukin; ISI, insulin sensitivity index; LDL, low-density lipoprotein; Lp-PLA $2$ , lipoprotein-associated phospholipase A $2$ ; PAI-1, plasminogen activator inhibitor-1; PUFA, polyunsaturated fatty acid; QUICKI, quantitative insulin sensitivity check index; TAG, triacylglyceride; TNF- $\alpha$ , tumor necrosis factor- $\alpha$ ; eGFR, estimated glomerular filtration rate; hsCRP, high-sensitivity C-reactive protein; ox-LDL, oxidized low-density lipoprotein; vWF, von Willebrand factor
