# Supplementary material for: Nutritional Strategies in Prediabetes: A Scoping Review of Recent Evidence
Source: Nutrients. 2020 Sep 29;12(10):2990. doi: 10.3390/nu12102990 (PMC7650618; doi:10.3390/nu12102990)
Supplement: Supplementary file 1 [file nutrients-12-02990-s001.zip]

Archive with 5 entries (5 files):
- Table S1.pdf
- Table S2.pdf
- Table S3.xlsx
- Table S4.pdf
- Table S5.pdf
