# Supplementary material for: Nutritional Strategies in Prediabetes: A Scoping Review of Recent Evidence
Source: Nutrients. 2020 Sep 29;12(10):2990. doi: 10.3390/nu12102990 (PMC7650618; doi:10.3390/nu12102990)
Supplement: Supplementary file 1 [file nutrients-12-02990-s001.zip › Table S3.xlsx]

## Sheet: Sheet1
Table S3. Summary of included studies (n=95)
Reference	First author	Year	Title	Country	Study design	No. of participants	Population	Duration	Mean age or age range (y)	Nutrition education	Intervention	Control diet	Outcomes measured	Main finding	Adverse effects of intervention
17	An, S. Y.	2013	Beneficial effects of fresh and fermented kimchi in prediabetic individuals	Korea	Randomised, crossover study	21	Prediabetic adults	20 weeks	45.9 ± 9.8	No	100 g of Fresh kimchi or Fermented kimchi per meal (3x daily)	-	Anthropometric factors (height, weight BMI, waist and hip circumference), total fat mass and percent body fat, systolic and diastolic BP, plasma glucose, serum insulin levels, insulin resistance	Consumption of both types of kimchi significantly decreased body weight, body mass index, and waist circumference. Fermented kimchi decreased insulin resistance, and increased insulin sensitivity. Systolic and diastolic blood pressure decreased significantly in the fermented kimchi group.	Not mentioned
18	Choi, M. S.	2014	The beneficial effect of soybean (Glycine max (L.) Merr.) leaf extracts in adults with prediabetes: a randomized placebo controlled trial	Korea	Randomized, double-blind, placebo-controlled trial	45	Prediabetic adults with a fasting blood glucose level of 100–125 mg dL-_x0001_1	12 weeks	20–70 years	No	Banaba extract (300 mg per day; 0.3% corosolic acid) or soybean leaf extract (2 g per day)	Placebo (starch, 2 g per day)	Height, weight, body fat content, waist circumference, hip circumference, blood pressure and fasting blood glucose, HbA1c, lipids and aminotransferase	Soybean leaf extract and banaba extract significantly decreased the baseline-adjusted final blood glucose, HbA1c, HOMA-IR and transaminase levels compared to the placebo group.	No adverse effect
19	Kim, M.	2014	Replacing with whole grains and legumes reduces Lp-PLA2 activities in plasma and PBMCs in patients with prediabetes or T2D	Korea	RCT	99	Adults with IFG, IGT, or newly-diagnosed T2D	12 weeks	Intervention: 56.3 ± 1.2 Control: 55.4 ± 1.5	Yes	Consumption of whole grains and legumes as a carbohydrate source	Usual diet with refined rice	Anthropometric parameters, blood pressure, blood glucose level, hemoglobin A1c, insulin resistance, serum lipid profile, FFAs, and serum high-sensitivity C-reactive protein, cytokines, urinary 8-epi-prostaglandin F 2 _x0003_ and plasma malondialdehyde, plasma oxidized LDL, LDL particle size, and Lp-PLA 2 activity	The whole grain and legume group showed a significant decrease in fasting glucose, insulin, homeostasis model assessment-insulin resistance, hemoglobin A1c , malondialdehyde, plasma Lp-PLA 2 activity, and oxidized LDL (ox-LDL), and an increase in LDL particle size	Not mentioned
20	Kwak, J. H.	2010	Black soy peptide supplementation improves glucose control in subjects with prediabetes and newly diagnosed type 2 diabetes mellitus	Korea	Randomized, double-blind, placebo-controlled trial	42	Adults with prediabetes and newly diagnosed type 2DM not requiring medication	12 weeks	Intervention: 56.8 ± _x0005_1.53 Control:57.6 ± _x0005_2.01	No	Three pouches containing black soy peptides (4.5 g of supplement/day)	Placebo	Fasting serum concentrations of glucose, hemoglobin A1c, insulin, and free fatty acids	Subjects who consumed black soy peptides tended to have lower fasting glucose levels and had a significant reduction in 2-hour PG level	Not mentioned
21	Kwak, J. H.	2012	Dietary treatment with rice containing resistant starch improves markers of endothelial function with reduction of postprandial blood glucose and oxidative stress in patients with prediabetes or newly diagnosed type 2 diabetes	Korea	Randomized, double-blind, placebo-controlled trial	85	Adults with IFG, IGT, or newly-diagnosed T2D	4 weeks	Intervention: 51.7 _x0007_± 2.03 Control: 49.4 _x0007_± 1.74	No	Rice containing 6.51 g resistant starch (low-glycemic-index carbohydrate)	Placebo (high-glycemic-index carbohydrate)	Fasting and postprandial levels of glucose and insulin, oxidative stress markers and endothelial function	The diet containing rice with resistant starch reduced fasting insulin and insulin resistance, postprandial glucose and insulin levels. Rice with resistant starch also decreased urinary 8-epi-PGF2a and plasma malondialdehyde (MDA) and increased the RH-PAT index and total nitric oxide (NO).	No serious adverse effect
22	Nah, E. H.	2019	Efficacy of lifestyle interventions in the reversion to normoglycemia in Korean prediabetics: One-year results from a randomised controlled trial	Korea	prospective, multicenter, and randomized trial	799	Prediabetic adult from 30-70 years old	4 years	LIG: 53.4 ± 9.2 years CG: 54.0 ± 9.5 years	Yes	All participants werescheduled for follow-up visits every 3 months during the firstyear and thereafter annually up to 3 years LIG: Five sessions (including baseline and each follow-up visit) of personalized counseling for promoting their diet,alcohol, and exercise hehaviors based on 3-day food recordsand the average frequency of exercise per week. Aim for reduction of 5% or more, 50–60% of thedai…	All participants were scheduled for follow-up visits every 3 months during the firstyear and thereafter annually up to 3 years CG: Received blood glucose tests withbooklet on the general health information alone at baseline and every 3-month visit during the first year. They did not receive lifestyle or diet assessments.	Primary outcome: the proportion of partici-pants who reverted to normoglycemia during the first year, BMI, blood pressure,and lipids Secondary outcome: lifestyle questionnaires that included diet,alcohol, and exercise behaviors	In terms of main outcome, the cumulative incidence of reversion from predia-betes to normoglycemia at the first year was 37.9% in theLIG and 29.6% (90/304) in the CG. After adjustment for age, sex, familyhistory of diabetes, BMI, blood pressure, and lipids, the hazard ratio for reverting to normo-glycemia remained significantly higher in the LIG than inthe CG.	Not mentioned
23	Minjoo, Kim	2016	Replacing carbohydrate with protein and fat in prediabetes or type-2 diabetes: greater effect on metabolites in PBMC than plasma	Korea	RCT	80	nonobese subjects with prediabetes or newly-diagnosed type-2 diabetes	12 weeks	data not shown	No	whole grains and legumes	usual refined-rice diet	Clinical characteristics, lipid profiles, and nutrient intake, Fasting glucose, insulin, and malondialdehyde, Plasma ox-LDL, LDL particle size, Lp-PLA2 activity in plasma and unstimulated PBMC, Metabolic profiling of PBMC and plasma using UPLC-LTQorbitrap MS	dietary intervention in prediabetic or type-2 diabetic patients had a greater effect on PBMC Lp-PLA2 activity and metabolites compared with those of plasma metabolites	Not mentioned
24	Kobayakawa, A.	2013	Improvement of fasting plasma glucose level after ingesting moderate amount of dietary fiber in Japanese men with mild hyperglycemia and visceral fat obesity	Japan	Double-blind, randomized, placebo-controlled trial	30	Males with fasting plasma glucose levels more than 5.6 mmol/L (not T2DM), visceral fat areas more than 100 cm2, and BMI less than 35	12 weeks	53.5 ± 5.4	No	Test food mainly composed of oat bran, chicory root extract, and partially hydrolyzed guar gum. It also contained konjac root extract and seaweed extract	Placebo with no dietary fiber	Anthropometric parameters, levels of glucose, hemoglobin A1c (HbA1c), insulin, C-peptide, and adiponectin.	In the test food group, fasting plasma glucose level, body weight and body mass index were reduced	- transient loose stool
25	Taniguchi-Fukatsu, A.	2012	Natto and viscous vegetables in a Japanese-style breakfast improved insulin sensitivity, lipid metabolism and oxidative stress in overweight subjects with impaired glucose tolerance	Japan	randomised, crossover trial	11	Overweight subjects with impaired glucose tolerance (IGT)	2 weeks	45·2 ± 2.9 years	No	boiled white rice with natto (viscous fermented soyabeans), Japanese yam and okra	white rice with non-viscous boiled soyabeans, potatoes and broccoli	insulin sensitivity, fasting blood glucose, fasting serum insulin, HbA1c, Adipocytokine, serum lipid, oxidative stres	a breakfast of natto and viscous vegetables consumed for 2 weeks improves insulin sensitivity, serum lipid and oxidative stress	No adverse effect
26	Saito, T	2011	Lifestyle Modification and Prevention of Type 2 Diabetes in Overweight Japanese With Impaired Fasting Glucose Levels: A Randomized Controlled Trial	Japan	unmasked, multicenter, randomized, controlled trial	641	overweight Japanese with impaired fasting glucose levels	36 months	Intervention: 50 years Control: 48 years	Yes	frequent intervention group (received individual instructions and follow-up support for lifestyle modification from the medical staff 9 times)	Control group (received similar individual instructions 4 times at 12-month intervals during the same period)	primary outcome: type 2 diabetes incidence	Lifestyle modifications can prevent type 2 diabetes among overweight Japanese with impaired fasting glucose levels	No serious adverse effect
27	Sakane, N.	2011	Prevention of type 2 diabetes in a primary healthcare setting: Three-year results of lifestyle intervention in Japanese subjects with impaired glucose tolerance	Japan	RCT	304	middle-aged IGT subjects	3 years	Intervention: 51 ± 7 years Control: 51 ± 6 years	Yes	lifestyle intervention group	Control group	primary outcome: development of diabetes other outcomes: BMI, glucose profile, Matsuda index, Aspartate aminotransferase, alanine aminotransferase, Gamma-glutamyltransferase	The present lifestyle intervention program using existing healthcare resources is beneficial in preventing diabetes in Japanese with IGT.	Not mentioned
28	Bi, M.	2013	Effects of barley flake on metabolism of glucose and lipids in the patients with impaired fasting glucose	China	RCT	100	IFG adult	3 months	Oat meal: 61. 9 ± 6. 0 years Barley flake: 59. 8 ± 8. 0 years	No	Barley flake	Oat meal	Biochemical indicators, glucose-lipid metabolism related enzymes, the area under curve (AUC) of blood glucose and insulin after oral glucose tolerance test (OGTT), homeostasis model assessment of insulin resistance (HOMA-IR),	Barley Flakes had favorable effect on improvement of glucose-lipid metabolism in the patients with impaired fasting glucose.	Not mentioned
29	Cheng, S.	2017	Effect of aerobic exercise and diet on liver fat in pre-diabetic patients with non-alcoholic-fatty-liver-disease: A randomized controlled trial	China	Four-arm parallel-group, randomized controlled trial	115	Adults with IFG or IGT and diagnosed as NAFLD	8.6 months	50–65 years	Yes	Aerobic exercise (AEx), Diet, Exercise plus diet (AED) Diet = daily lunch plus an individual nutritional consultation program	No intervention (NI)	Hepatic fat content (HFC), measurements of height, weight, waist circumference, blood pressure, physical performance, and body composition by dual-X-ray densitometry	HFC was significantly reduced in the AEx, diet, and AED groups by contrast to the NI group after intervention. However, only AED group significantly decreased HbA1c compared with the NI group.	Not mentioned
30	Gong, Q.	2011	Long-term effects of a randomised trial of a 6-year lifestyle intervention in impaired glucose tolerance on diabetes-related microvascular complications: the China Da Qing Diabetes Prevention Outcome Study	China	RCT	542	Adults with IGT	Intervention: 6 years Follow-up: 20 years	Intervention: 44.7 ± 9.3 Control: 46.7 ± 9.2	Yes	Diet, exercise, or diet plus exercise Diet: increase vegetable intake and lower their alcohol and sugar intake and, in those who were overweight or obese, to lose weight by reducing total calorie intake	General information about diabetes and IGT and general instructions for diet and/or increased leisure physical activities	Incidence of microvascular complications	The incidence of severe retinopathy was 47% lower in the intervention group than the control group	Not mentioned
31	Ren, X.	2018	The Glucose-Lowering Effect of Foxtail Millet in Subjects with Impaired Glucose Tolerance: A Self-Controlled Clinical Trial	China	open-label, self-controlled clinical trial	70	IGT adult	12 weeks	56.0 ± 7.1 years	No	Fifty g/day of foxtail millet	-	Fasting blood glucose, 2h- glucose, insulin resistance index, fasting insulin (FINS), fructosamin, fasting C-peptide, total triglyceride, HDL-C, LDL-C, apolipoprotein A1 and B	Foxtail millet could improve the glycemic control in free-living subjects with IGT	Not mentioned
32	Bui, T. N.	2014	Pre-germinated brown rice reduced both blood glucose concentration and body weight in Vietnamese women with impaired glucose tolerance	Vietnam	Controlled clinical trial	60	Women with impaired glucose tolerance	4 months	45–65 years	No	Pre-germinated brown rice (PGBR)	White rice (WR)	Anthropometric measurements and blood biochemical examinations (glucose, HbA1c, TG, HDL-C, LDL-C, TC)	Parameters of blood biochemistry tests were significantly improved in the PGBR group but only HDL-C in the WR group	Not mentioned
33	Chuengsamarn, S.	2012	Curcumin Extract for Prevention of Type 2 Diabetes	Thailand	randomized, double-blinded, placebocontrolled tria	240	prediabetic adult	9 months	Intervention: 56.95 years Placebo: 57.93 years	Yes	curcumin	Placebo	Primary outcome: progression to T2DM Secondary outcomes: changes of the b-cell functions (homeostasis model assessment [HOMA]-b, C-peptide, and proinsulin/insulin ratio), insulin resistance (IR) by HOMA-IR, obesity (body weight), abdominal obesity (waist circumference [WC]), and anti-inflammatory cytokine (adiponectin)	9-month curcumin intervention in a prediabetic population significantly lowered the number of prediabetic individuals who eventually developed T2DM, improve overall function of b-cells, with very minor adverse effects	- itching - constipation - vertigo
34	Ford, C. N.	2019	Dietary changes in a diabetes prevention intervention among people with prediabetes: the Diabetes Community Lifestyle Improvement Program trial	India	RCT	485	Overweight/obese adults with prediabetes	Intervention: 6 months Follow-up: 1 year	20–65 years	Yes	Lifestyle intervention (structured educational curriculum designed to reduce the incidence of diabetes through weight loss (≥ 7% weight loss), achieving at least 150 min of moderate activity weekly and reducing the intakes of fat (to < 30% of total energy) and total energy)	Standard treatment (met once with a physician and dietician, attended two classes on healthy dietary changes, weight loss and exercise to reduce risk of diabetes, and received informational handouts related to prevention of diabetes through weight loss, heathy dietary changes and increased physical activity)	Diet, incident diabetes	Lifestyle intervention decreased the total energy intake and increased the intakes of fruits and vegetables, and reduced the 1-year incidence of diabetes by half.	Not mentioned
35	Liu, Z. M.	2010	Effects of soy protein and isoflavones on glycemic control and insulin sensitivity: A 6-mo double-blind, randomized, placebo-controlled trial in postmenopausal Chinese women with prediabetes or untreated early diabetes	Hong Kong	Double-blind, randomized, placebo-controlled trial	180	Postmenopausal women with prediabetes or early untreated diabetes.	24 weeks	48–70 years	No	15 g milk protein + 100 mg isoflavones (Iso group) or 15 g soy protein + 100 mg isoflavones (Soy group)	Placebo (15 g milk protein)	Anthropometric parameters, fasting and 2-h postload glucose, fasting and postload insulin, glycated serum protein, and homeostasis model assessment for insulin resistance and b-cell function.	Three- or 6-mo treatments with soy protein with or without isoflavone supplementation did not result in favorable changes in the descriptors for glycemic control and insulin resistance.	- GI discomfort - mild vaginal bleeding - breast swelling pain
36	Niroomand, M.	2019	Does high-dose vitamin D supplementation impact insulin resistance and risk of development of diabetes in patients with pre-diabetes? A double-blind randomized clinical trial	Iran	double-blind, placebo-controlled randomized clinical trial	162	Prediabetic adult with vitamin D deficiency	6 months	Vitamin D: 45 ± 14 Placebo: 48 ± 11	No	Vitamin D3	Placebo	Serum 25-hydroxyvitamin D levels, Fasting plasma glucose (FPG), 2-h oral glucose tolerance test plasma glucose (OGTT PG), Homeostatic Model Assessment of Insulin Resistance (HOMA-IR), and the rate of progression of glucose tolerance	Serum 25-hydroxyvitamin D levels were significantly higher in the intervention group (36 ng/ml vs 16 ng/ml, P value < 0.001). There was no significant difference between FPG or 2H-OGTT PG in two groups. HOMA-IR score was significantly lower in the vitamin D group (2.6 vs. 3.1; P value = 0.04). The rate of progression toward diabetes was significantly lower in the intervention group	Not mentioned
37	Hoseini, S.A.	2013	The effects of oral vitamin D on insulin resistance in pre-diabetic patients	Iran	RCT	45	Prediabetic adults	12 weeks	47.4 ± 6.6 years	No	50,000 IU oral vitamin D and 500 mg calcium carbonate 300,000 IU intramuscular vitamin D and 500 mg calcium carbonate	500 mg calcium carbonate alone	Matsuda index, HOMA-IR, HOMA-B, HbA1c, FPG, 25 (OH) D, AUC glucose, AUC insulin	Oral vitamin D had no effect on insulin sensitivity in pre‑diabetes patients in 12 weeks treatment	Not mentioned
38	Alfawaz, H. A.	2018	Effects of Different Dietary and Lifestyle Modification Therapies on Metabolic Syndrome in Prediabetic Arab Patients: A 12-Month Longitudinal Study	Saudi Arabia	Randomized controlled (1:1:1) study	217	Adults with impaired fasting glucose	12 months	25–60 years	Yes	Intensive lifestyle modification programme: (a) Individual consultation with the dietician was done to assess the participant’s food intake. Special dietary charts were supplied to participants explaining how to reduce the total fat intake to less than 30% of energy consume and increase the fiber intake to 15 g/1000 Kcal. (b) Guidelines for physical activity were supplied as pamphlets to each par…	General advice: Advised to adopt lifestyle modifications in their dietary habits; weight reduction; exercise; increased physical activity Metformin	The status of MetS and its five components, total number of MetS components (taken as a continuous variable) and the MetS risk-score	Full MetS in the ILMP group decreased by 26% (p < 0.001); in GA + Met group by 22.4% (p = 0.01) and in GA group by 8.2% (p = 0.28). The number of MetS components decreased significantly in the ILMP and GA + Met groups. Between-group comparison revealed a clinically significant decrease in MetS components in favor of the ILMP group.	Not mentioned
39	Canfora, E. E.	2017	Supplementation of Diet With Galacto-oligosaccharides Increases Bifidobacteria, but Not Insulin Sensitivity, in Obese Prediabetic Individuals	The Netherlands	Double-blinded, placebo-controlled, parallel intervention study	44	Overweight or obese prediabetic adults	12 weeks	45–70 years	No	15g galacto-oligosaccharides (GOS)	15g isocaloric placebo (maltodextrin)	Peripheral and adipose tissue insulin sensitivity, fecal microbiota composition, plasma and fecal short-chain fatty acid (SCFA), energy expenditure and substrate oxidation, body composition, and hormonal and inflammatory responses.	Supplementation of diets with GOS, but not placebo, increased by 5-fold the abundance of Bifidobacterium spp. in feces. no significant alterations in peripheral and adipose tissue insulin sensitivity, body composition, and energy and substrate metabolism were found.	No adverse effect
40	den Boer, A. T.	2013	Prevention of the metabolic syndrome in IGT subjects in a lifestyle intervention: results from the SLIM study	The Netherlands	Randomized controlled intervention trial	146	Adults with IGT	Intervention duration: 3-6 years (on average 4.2 years)	Intervention: 58.2 _x0002_± 7.2 Control: 55.1 ±_x0002_ 6.5	Yes	Dietary and physical activity programme Diet = based on Dutch guidelines for a healthy diet (Dutch Nutrition Council), and consisted of: carbohydrate intake of at least 55% of total energy intake, a reduction in fat intake of to 30e35% of total energy intake, and increased intake of dietary fiber (>3 g/MJ/day)	General information about beneficial effects of a healthy diet and increased physical activity; no individual advice was provided	Anthropometry, glucose tolerance, blood profile and blood pressure and aerobic fitness	At the end of active intervention, prevalence of MetS was significantly lower in the intervention group compared to the control group	Not mentioned
41	van Can, J. G.	2012	Reduced glycaemic and insulinaemic responses following trehalose and isomaltulose ingestion: implications for postprandial substrate use in impaired glucose-tolerant subjects	The Netherlands	randomised, singleblind, cross-over design	10	overweight IGT subjects	~ 4 weeks	56 ± 8 years	No	glucose (GLUC) v. trehalose (TRE) and sucrose (SUC) v. isomaltulose (IMU)	-	circulating metabolites (response of glucose, insulin, NEFA, TAG), Thermogenesis and substrate oxidation	exchange of SUC in the diet for IMU may result in a more favourable metabolic response and may help to reduce the risks associated with obesity and type 2 diabetes	Not mentioned
42	Oosterwerff, M.M.	2014	Effect of moderate-dose vitamin D supplementation on insulin sensitivity in vitamin D–deficient non-Western immigrants in the Netherlands: a randomized placebo-controlled trial	Netherlands	randomized placebo-controlled trial	130	non-Western immigrants with prediabetes	16 weeks	Intervention: 48.9 ± 10.3 years Control: 51.5 ± 10.5 years	No	cholecalciferol (1200 IU/d)	placebo	primary outcome: the difference in the area under the curve of insulin and glucose after a 75-g oral-glucose-tolerance test after 4 mo of treatment Secondary outcomes: insulin-sensitivity variables, b cell–function variables, and metabolic syndrome	Vitamin D supplementation in non-Western vitamin D–deficient immigrants with prediabetes did not improve insulin sensitivity or b cell function or change the incidence of metabolic syndrome	- nausea - constipation - itching
43	Abellan Ruiz, M. S.	2017	Effect of quinoa (Chenopodium quinoa)consumption as a coadjuvant in nutritional intervention in prediabetic subjects	Spain	Randomized (2:1), placebo-controlled, double-blind study	29	Prediabetic adults	28 days	59.5 ± 10.7	No	Processed quinoa	Placebo (maltodextrin)	BMI, HbA1c, fasting plasma glucose and the satiation and fullness degree	Processed quinoa intake decreases BMI and HbA1c levels, maintains FPG levels, and increases the satiation and fullness (complete) degree	No adverse effect
44	Canudas, S.	2019	Pistachio consumption modulates DNA oxidation and genes related to telomere maintenance: a crossover randomized clinical trial	Spain	Randomized, controlled, crossover trial	49	Prediabetic adults with BMI ≤35 kg/m2	8 months 2 weeks	55.7 (53.9, 57.4)	No	Pistachio supplemented diet (PD, 50 E% [energy percentage] carbohydrates and 33 E% fat, including 57 g pistachios/d)	Isocaloric control diet (CD, 55 E% carbohydrates and 30 E% fat)	DNA damage (via 8-hydroxydeoxyguanosine), leucocyte telomere length and gene expression, plasma fasting glucose and insulin, insulin resistance	Chronic pistachio consumption reduces oxidative damage to DNA and increases the gene expression of some telomere-associated genes (TERT and WRAP53). Upregulation of TERT correlated to a decrease in fasting plasma glucose concentrations and insulin resistance.	Not mentioned
45	Hernandez-Alonso, P.	2014	Beneficial effect of pistachio consumption on glucose metabolism, insulin resistance, inflammation, and related metabolic risk markers: a randomized clinical trial	Spain	Randomized, controlled, crossover trial	54	Prediabetic adults with BMI ≤35 kg/m2	8 months 2 weeks	55 (53.4, 56.8)	No	Pistachio-supplemented diet (PD, 50% carbohydrates, 33% fat, including 57g/d of pistachios daily)	Control diet (CD, 55% carbohydrates, 30% fat)	Anthropometry, Body Composition, Blood Pressure, Biological Samples (Plasma fasting glucose and serum lipid profile, etc.), Cellular Glucose Uptake, Gene Expression Analysis	Fasting glucose, insulin, and HOMA of insulin resistance decreased significantly after the PD compared with the CD.	No GI adverse effect
46	Hernandez-Alonso, P.	2015	Effect of pistachio consumption on plasma lipoprotein subclasses in pre-diabetic subjects	Spain	Randomized, controlled, crossover trial	49	Prediabetic adults with BMI ≤35 kg/m2	8 months 2 weeks	55 (53.4, 56.8)	No	Pistachio-supplemented diet (PD, 50% carbohydrates, 33% fat, including 57g/d of pistachios daily)	Control diet (CD, 55% carbohydrates, 30% fat)	Serum lipid profiles	Small low-density lipoprotein particles (sLDL-P) and non-high-density lipoprotein particles (non- HDL-P i.e. VLDL-P plus LDL-P) significantly decreased after pistachio consumption compared to the nut-free diet	No GI adverse effect
47	Hernandez-Alonso, P.	2017	Effect of pistachio consumption on the modulation of urinary gut microbiota-related metabolites in prediabetic subjects	Spain	Randomized crossover clinical trial	39	Prediabetic adults with BMI ≤35 kg/m2	8 months 2 weeks	25-65 years	No	Pistachio-supplemented diet (PD, 50% carbohydrates, 33% fat, including 57g/d of pistachios daily)	Control diet (CD, 55% carbohydrates, 30% fat)	Changes in 24-h urine metabolites	Three metabolites related with gut microbiota metabolism (i.e. hippurate, p-cresol sulfate and dimethylamine), cis-aconitate (intermediate of the tricarboxylic acid (TCA)) and trimethylamine N-oxide (TMAO) were found decreased in PD compared with CD. Creatinine levels were significantly increased in PD	Not mentioned
48	Hernandez-Alonso, P.	2017	Chronic pistachio intake modulates circulating microRNAs related to glucose metabolism and insulin resistance in prediabetic subjects	Spain	Randomized, controlled, crossover trial	49	Prediabetic adults with BMI ≤35 kg/m2	8 months 2 weeks	25-65 years	No	Pistachio-supplemented diet (PD, 50% carbohydrates, 33% fat, including 57g/d of pistachios daily)	Control diet (CD, 55% carbohydrates, 30% fat)	A set of seven predefined miRNAs related to glucose and insulin metabolism (hsamiR-15a-5p, hsa-miR-21-5p, hsa-miR-29b-3p, hsa-miR-126-3p, hsa-miR-192-5p, hsa-miR-223-3p, hsa-miR-375)	After the PD period, subjects have shown significant lower circulating levels of miR-192 and miR-375 compared to CD period, were positively correlated with plasma glucose, insulin and HOMA-IR.	Not mentioned
49	Roncero-Ramos, I.	2020	Prediabetes diagnosis criteria, type 2 diabetes risk and dietary modulation: The CORDIOPREV study	Spain	prospective, randomized, opened, controlled trial	462	393 prediabetic and 69 non-prediabetic adult	60 months	Non-PreDM: 55.1 ± 1.1 PreDM isolated HbA1c: 57.3 ± 0.7 PreDM-IFG/IGT: 58.8 ± 0.6	Yes	Mediteranian diet	low fat diet	glucose homeostasis, Beta-cell function and insulin resistance function indexes, Diabetes-free probability analysis by diet	Patients who had both IFG and IGT and consumed a low-fat diet had a lower T2DM risk than those who consumed a Mediterranean diet	Not mentioned
50	Carnevale, R.	2017	Extra virgin olive oil improves post-prandial glycemic and lipid profile in patients with impaired fasting glucose	Italy	Randomized, controlled, crossover trial	30	Adults with impaired fasting glucose	6 months	58.1 ± 11.4	No	Meal containing 10g of extra virgin olive oil (EVOO)	Isoenergetic meal without EVOO	Serum levels of glucose, insulin, total glucagon-like peptide-1 (GLP1, 7-36 and 9-36 peptides), apolipoprotein (Apo) B-48 and dipeptidyl-peptidase-4 (DPP-4) activity	The meal containing EVOO was associated with a reduction of glucose, DPP4 activity, triglycerides and Apo B-48, and a significant increase of insulin and GLP-1 compared with the meal without EVOO.	Not mentioned
51	Di Pino, A.	2016	Low advanced glycation end product diet improves the lipid and inflammatory profiles of prediabetic subjects	Italy	Randomized, controlled, dietary observational perspective trial	62	Prediabetic adults	24 weeks	54.8 ± 8.4	No	low advanced glycation end products (L-dAGEs) diet	standard dAGE (S-dAGEs) diet	Lipid profile, endogenous secretory receptors for AGEs, high-sensitivity C-reactive protein, arterial stiffness, and intima-media thickness	Patients with L-dAGEs showed a significant reduction of total cholesterol, apolipoprotein B, and low-density lipoprotein, high-sensitivity C-reactive protein levels and intima-media thickness compared with controls	Not mentioned
52	Monti, L. D.	2013	L-arginine enriched biscuits improve endothelial function and glucose metabolism: a pilot study in healthy subjects and a cross-over study in subjects with impaired glucose tolerance and metabolic syndrome	Italy	Double blind crossover study	pilot postprandial study: 7 healthy subjects, second study:15 obese subjects	1st study: healthy adult 2nd study: obese adult with IGT and MS	14 days	1st study: 36.0±4.0 years 2nd study: 62.5±3.5 years	No	L-arginine-enriched biscuits	Placebo Biscuit	1st study: L-arginine Plasma level, NOx plasma level, c-GMP plasma level, forearm blood flow 2nd study: fasting L-arginine levels, postprandial glucose levels, NOx plasma level, c-GMP plasma level, plasma insulin level, Matsuda insulin sensitivity index	L-Arginine-enriched biscuits with low sugar and protein content enhance endothelial function and improve glucose metabolism, insulin sensitivity and insulin secretion in subjects with IGT and MS.	Not mentioned
53	Monti, L. D.	2018	Decreased diabetes risk over 9 year after 18-month oral L-arginine treatment in middle-aged subjects with impaired glucose tolerance and metabolic syndrome (extension evaluation of L-arginine study)	Italy	RCT	144	Middle aged adult with IGT and MS	108 months	Not mentioned, middle-aged	No	L-arginine supplementation	Placebo therapy	Primary outcome: diagnosis of diabetes Secondary outcome: changes in insulin secretion (proinsulin/c-peptide ratio), insulin sensitivity (IGI/HOMA-IR), oxidative stress (AOPPs), and vascular function	At the end of the study, thecumulative incidence of diabetes was of 40.6% in the l-arginine group and of 57.4% in the placebo group. The adjusted HR for diabetes (l-arginine vs. placebo) was 0.66. Proinsulin/c-peptide ratio (p < 0.001), IGI/HOMA-IR (p < 0.01), and AOPP (p < 0.05) levels were ameliorated in l-arginine compared to placebo.	No adverse effect
54	Erkkila, A. T.	2019	Camelina sativa Oil, Fatty Fish, and Lean Fish Do Not Markedly Affect Urinary Prostanoids in Subjects with Impaired Glucose Metabolism	Finland	RCT	72	Adults with impaired fasting glucose	12 weeks	58.9 ± 6.5	No	fatty fish (four fish meals/week), lean fish (four fish meals/week), Camelina sativa oil (10 g d-1 ALA)	control (limited intakes of fish and sources of ALA)	Urinary prostanoids (prostaglandin F2α, 5-F2t-isoprostanes and 15-F2t-isoprostane metabolites, isofuran, 8-F3t-isoprostanes, and 4-(RS)-4-F4t-neuroprostane)	CSO, fatty fish, and lean fish consumption do not cause major changes in oxidative stress markers	Not mentioned
55	Schwab, U.S.	2018	Camelina Sativa Oil, but not Fatty Fish or Lean Fish, Improves Serum Lipid Profile in Subjects with Impaired Glucose Metabolism—A Randomized Controlled Trial	Finland	RCT	79	adults with impaired fasting glucose	12 weeks	58.9 ± 6.5 years	Yes	FF (four fish meals/week), LF (four fish meals/week), CSO (10 g d-1 ALA)	control (limited intakes of fish and sources of ALA)	Dietary intake and compliance, serum total and lipoprotein lipids, glucose metabolism and inflammatory markers	A diet enriched in CSO improves serum lipid profile as compared with a diet enriched in FF or LF in subjects with impaired fasting glucose, with no differences in glucose metabolism or concentrations of inflammatory markers.	Not mentioned
56	de Mello, V. D. F.	2011	A diet high in fatty fish, bilberries and wholegrain products improves markers of endothelial function and inflammation in individuals with impaired glucose metabolism in a randomised controlled trial: The Sysdimet study	Finland	parallel design, dietary intervention trial	131	individuals with impaired glucose metabolism and features of the metabolic syndrome	12 weeks	Healthy diet: 59±7 years whole grain-enriched diet: 58±8 years control diet: 59±7 years	Yes	Healthy Diet (n=44) and a whole-grain-enriched diet (WGED) (n=42)	control diet	Primary outcome: the change in plasma inflammatory markers Secondary outcomes: High-sensitivity (hs) C-reactive protein (CRP) and E-selectin responses	the combined effect of fatty fish, bilberries and wholegrain products may improve endothelial dysfunction and inflammation in overweight and obese individuals at high risk of developing diabetes	Not mentioned
57	Lankinen, M	2011	Whole Grain Products, Fish and Bilberries Alter Glucose and Lipid Metabolism in a Randomized, Controlled Trial: The Sysdimet Study	Finland	RCT	106	men and women with impaired glucose metabolism and with at least two other features of the metabolic syndrome	12 weeks	Healthy diet: 58±7 years Whole grain-enriched diet: 58±8 years control diet: 59±7 years	No	Healthy Diet and a whole-grain-enriched diet (WGED)	refined wheat breads (Control)	Oral glucose tolerance, glucose and insulin parameters, plasma fatty acids and lipidomic profiles	The results suggest that the diet rich in whole grain and low insulin response grain products, bilberries, and fatty fish improve glucose metabolism and alter the lipidomic profile. Therefore, such a diet may have a beneficial effect in the efforts to prevent type 2 diabetes in high risk persons.	Not mentioned
58	Honsek, C.	2018	Fibre supplementation for the prevention of type 2 diabetes and improvement of glucose metabolism: the randomised controlled Optimal Fibre Trial (OptiFiT)	Germany	Randomised, placebo-controlled, double-blind, parallel-group trial	117	Prediabetic adults	24 months	60 ± 10	Yes	Cereal fibre supplement (7.5 g of insoluble fibre per serving)	Placebo	Change in 2 h post-challenge plasma glucose, insulin sensitivity and hepatic insulin clearance, anthropometric	There is no strong evidence for a beneficial effect of insoluble cereal fibre on glycaemic metabolism	No GI adverse effects
59	Konig, D.	2014	A meal replacement regimen improves blood glucose levels in prediabetic healthy individuals with impaired fasting glucose	Germany	Randomized, controlled, parallel-group trial	42	Overweight or obese adults with prediabetes	6 weeks	54 ± 8	Yes	Meal replacement group: replace two daily meals by a low-caloric high soy-protein drink with a low glycemic index	Lifestyle group: dietary counselling sessions (fat restricted low calorie diet) and instructions how to increase physical activity	Body weight, height, BMI (kg/m2), fasting blood glucose and fasting insulin from which the insulin resistance was calculated	Both interventions resulted in a significant decrease in body weight, BMI, insulin and HOMA-IR although this reduction was more pronounced in the MR group. In both groups glucose concentrations decreased significantly and mean glucose levels returned into the normal range.	Not mentioned
60	Sartorius, T.	2019	Postprandial Effects of a Proprietary Milk Protein Hydrolysate Containing Bioactive Peptides in Prediabetic Subjects	Germany	randomized, double-blind, placebo-controlled, monocentric, 3-way-cross-over study	21	Prediabetic adult	6 weeks	62.4 years	No	low- or high-dosed milk protein hydrolysate	placebo	Incremental areas under the curve (iAUC) of glucose, postprandial glucose, Matsuda Index, HbA1c, glucose response after 6 weeks of intervention	The current milk protein hydrolysate of native whey origin has the potential to modulate postprandial hyperglycemia and hence may contribute in reducing the future risk of developing T2DM	No adverse effect (have AE which is not related to the study product)
61	Dodevska, M. S.	2016	Effects of total fibre or resistant starch-rich diets within lifestyle intervention in obese prediabetic adults	Serbia	RCT	47	Overweight and obese individuals with prediabetes	12 months	45–74 years	Yes	Resistant starch-rich diet (RS)	Fibre-rich diet (>25 g/day)	Anthropometry, plasma glucose, insulin, insulin resistance and serum lipids	Decrease in total cholesterol and non-HDL-cholesterol was more pronounced in RS group in comparison with Fibre group, whereas in Fibre group, a more pronounced effect on glucoregulation was observed	Not mentioned
62	Polovina, S.	2010	[The influence of diet with reduction in calorie intake on metabolic syndrome parameters in obese subjects with impaired glucose tolerance]	Serbia	RCT	55	Obese adult with IGT	12 weeks	Not mentioned	No	Diet of energy values ​​from 1,200 kcal (women) to 1,500 kcal (men)	No specific dietary regimen	Waist circumference, blood pressure, fasting glycemia, insulin, HDL cholesterol, triglycerides, insulin resistance	Waist circumference, systolic blood pressure, fasting glycemia, insulin resistance index and triglycerides decreased significantly in the intervention group	Not mentioned
63	Mitrou, P.	2015	The role of acetic acid on glucose uptake and blood flow rates in the skeletal muscle in humans with impaired glucose tolerance	Greece	Crossover RCT	8	IGT adult	52 weeks	46 ± 10 years	No	Vinegar	Placebo	Arterial plasma insulin, muscle blood flow, arterial plasma triglycerides, muscle blood glucose, arterial plasma glucose	In individuals with IGT, vinegar ingestion before a mixed meal results in an enhancement of muscle blood flow, an improvement of glucose uptake by the forearm muscle and a reduction of postprandial hyperinsulinaemia and hypertriglyceridaemia.	No adverse effect
64	Papakonstantinou, E.	2018	Effects of 6 vs 3 eucaloric meal patterns on glycaemic control and satiety in people with impaired glucose tolerance or overt type 2 diabetes: A randomized trial	Greece	Randomized crossover study	47	Adult with IGT or T2D	12 weeks	49.3 (1.8)	Yes	weight maintenance diet (45% carbohydrates, 20% proteins, 35% fats) in 6 meals/day	weight maintenance diet (45% carbohydrates, 20% proteins, 35% fats) in 3 meals/day	OGTT, HbA1c and plasma lipids	6 vs 3 meals a day can increase glycaemic control in obese patients with early-stage T2D, and may perhaps improve and/or stabilize postprandial glucose regulation in prediabetes subjects	No adverse effect
65	Kontogianni, M.D.	2011	Changes in dietary habits and their association with metabolic markers after a non-intensive, community-based lifestyle intervention to prevent type 2 diabetes, in Greece. The DEPLAN study	Greece	Intervention trial	126	Adults with NFG, IFG or IGT	1 year	56.3 ± 10.8 years	Yes	Lifestyle intervention programme (reduction of saturated fat, sugars and refined cereals intake and at least five servings of fruits and vegetables, daily)	-	changes in dietary habit and physical activities variables, blood pressure, Glucose fasting plasma, Glucose 2 h post-load OGTT, lipid profile	The implementation of a group-based, non-intensive dietary counseling proved to be practical and feasible in ‘‘real-world’’ community settings and was accompanied by favorable dietary changes and health benefits	Not mentioned
66	Pietraszek, A.	2011	Acute effects of dietary fat on inflammatory markers and gene expression in first-degree relatives of type 2 diabetes patients	Denmark	controlled, randomized cross-over study	34	Relatives of T2D patients and control	240 mins	REL: 55 .0 years CON: 46.0 years	No	monounsaturated fatty acids (MUFA)	medium-chain saturated fatty acids (SFA)	Plasma hs-CRP, Plasma C-reactive protein, Plasma Interleukin-6, Total plasma adiponectin, plasma leptin, gene expression	MUFA and medium-chain SFA elicit similar postprandial circulating inflammatory responses in REL and CON. Medium-chain SFA seems more proinflammatory than MUFA, judged by the gene expression in muscle and adipose tissue of REL and CON	Plasma IL-6 increased
67	Christensen, P.	2011	Comparison of a low-energy diet and a very low-energy diet in sedentary obese individuals: a pragmatic randomized controlled trial	Denmark	pragmatic randomized controlled trial	192	sedentary obese individuals	16 weeks	63 ± 6 years	Yes	very low-energy diets	low-energy diet	Primary outcome: weight change Other outcomes: changes in BMI, Waist circumference, Fasting blood glucose, total cholesterol, low density lipoprotein cholesterol, high density lipoprotein cholesterol, triglycerides, C-reactive protein, liver enzymes, urine – methyl ketones, blood pressure and pulse	The significantly lower loss of lean tissue in the LED group together with more frequently reported side effects in the VLED group, favours the choice of low-energy diet (LED) for the treatment of obesity	- bad breath - cold intolerance - flatulence - abdominal and intestinal symptoms - MSK symptoms - CNS and psychiatric symptoms - skin and subcutaneous symptoms - miscellaneous symptoms
68	Sollid, Stina Therese	2014	No effect of high-dose vitamin D supplementation on glycemic status or cardiovascular risk factors in subjects with prediabetes	Norway	RCT	511	IFG/IGT adult	5 years	62.1 ± 8.7	No	20,000 IU/week vitamin D3	placebo	glucose metabolism, insulin secretion or sensitivity, blood pressure, or hs-CRP	Vitamin D supplementation does not improve glycemic indices, blood pressure, or lipid status in subjects with IFG and/or IGT.	No major adverse effect
69	Wagner, H.	2016	No Effect of High-Dose Vitamin D Treatment on beta-Cell Function, Insulin Sensitivity, or Glucose Homeostasis in Subjects With Abnormal Glucose Tolerance: A Randomized Clinical Trial	Sweden	randomized 1:1, parallelgroup, double-blind, placebo-controlled study	44	adults with prediabetes, impaired fasting glucose (IFG), impaired glucose tolerance (IGT), or IFG and IGT	8 weeks	67.3 years	No	30,000 IU vitamin D3 once weekly	Placebo	Primary: relative change in first-phase serum insulin secretion (0–12 min; ISec0–12) Secondary: relative change in second-phase insulin secretion (12–120 min; ISec12–120), insulin sensitivity, and disposition index (DI), change in glucose tolerance, change in fasting p-glucose and HbA1c, and change in blood lipids	This study gives no support for any substantial effect of high-dose vitamin D treatment for 8 weeks in prediabetes or diet-treated type 2 diabetes on b-cell function, insulin sensitivity, or glycemic control.	No adverse effect
70	Baugh, M. E.	2018	Inulin Supplementation Does Not Reduce Plasma Trimethylamine N-Oxide Concentrations in Individuals at Risk for Type 2 Diabetes	United States	Randomized double-blind, placebo-controlled, parallel group design	18	Sedentary, overweight/obese adults who were prediabetic or at increased risk of developing diabetes	6 weeks	40–75 years	No	10 g/day of inulin derived from chicory root	10 g/day of a placebo (maltodextrin; 4 kcal/g)	Plasma trimethylamine N-oxide (TMAO) and trimethylamine (TMA) moieties (choline, L-carnitine, betaine, and γ-butyrobetaine)	Inulin supplementation did not reduce fasting or postprandial plasma TMAO concentrations	Not mentioned
71	Dube, J. J.	2011	Effects of weight loss and exercise on insulin resistance, and intramyocellular triacylglycerol, diacylglycerol and ceramide	United States	Randomised trial	16	Overweight to obese adults with either normal glucose tolerance (n=4), or impaired glucose tolerance (n=12)	16 weeks	67.2 ± 4.0	Yes	Diet-induced weight loss (DIWL) - reduction of 2,093.4–4,186.8 kJ/day (based on recent food records/history) and low-fat (<30% of energy from fat) diet	Aerobic exercise (EX)	Insulin sensitivity, intramyocellular lipids, body composition, blood chemistry	Diet-induced weight loss and exercise training both improved insulin resistance and decreased diacylglycerol (DAG), while only exercise decreased ceramides	Not mentioned
72	Errazuriz, I.	2017	Randomized controlled trial of a MUFA or fiber-rich diet on hepatic fat in prediabetes	United States	RCT	43	Prediabetic adults	12 weeks	MUFA: 62 ± 10 Fiber: 63 ± 13 Control: 60 ± 12	No	High monounsaturated fatty acid (MUFA) or fiber-rich diet	Control (diet consisting of high carbohydrate, low fat, and low fiber)	liver fat fraction (LFF), glucose tolerance, and indices of insulin action and secretion.	MUFA diet decreases hepatic fat and improves both hepatic and total insulin sensitivity	Not mentioned
73	Grizales, A. M.	2018	Metabolic Effects of Betaine: A Randomized Clinical Trial of Betaine Supplementation in Prediabetes	United States	Parallel arm, randomized, double-masked, placebo-controlled trial	27	Obese adults with prediabetes	12 weeks	Intervention: 57 ± 8 Control: 61 ± 67	No	Betaine 3300 mg orally twice daily for 10 days, then 4950 mg twice daily for 12 weeks	Placebo	Changes from baseline in insulin sensitivity, glycemia, hepatic fat, and endothelial function.	There was a 16.5-fold increase in plasma dimethylglycine in the betaine vs placebo arm. Insulin area under curve after oral glucose was reduced for betaine treatment compared with placebo. Insulin sensitivity, assessed by euglycemic hyperinsulinemic clamp, was not improved.	- eye irritation - mild nausea and abdominal cramps - exacerbation of diverticulitis - fluctuation of GGT - immune system disorder - urinary retention - upper respiratory tract infection
74	Hari, A.	2019	Exercise-induced improvements in glucose effectiveness are blunted by a high glycemic diet in adults with prediabetes	United States	Randomized trial	33	Obese adults with prediabetes	12 weeks	65 ± 3.8	Yes	Low GI diet	High GI diet	Weight, glucose effectiveness, insulin resistance and cardiorespiratory fitness	A high glycemic index diet may suppress exercise-induced enhancement of glucose effectiveness	Not mentioned
75	Haus, J. M.	2010	Free fatty acid-induced hepatic insulin resistance is attenuated following lifestyle intervention in obese individuals with impaired glucose tolerance	United States	Randomized trial	23	Older obese adults with IGT	12 weeks	66_x0004_ ± 1	Yes	Exercise training with a hypocaloric (HYPO;_x0002_1300 kcal) diet	Exercise training with an eucaloric (EU; _x0002_1800 kcal) diet	Hepatic glucose production and hepatic insulin resistance	Both lifestyle interventions are effective in reducing hepatic insulin resistance under basal and hyperinsulinemic conditions. The reversal of FFA-induced hepatic insulin resistance is best achieved with a combined exercise/caloric-restriction intervention	Not mentioned
76	Hutchins, A. M.	2013	Daily flaxseed consumption improves glycemic control in obese men and women with pre-diabetes: a randomized study	United States	Randomized, controlled, crossover trial	25	Obese adults with prediabetes	12 weeks	58.6 ± 6.3	No	13 g (2 tablespoons) per day flaxseed treatment, or 26 g (4 tablespoons) per day flaxseed treatment	No flaxseed supplementation	Fasting glucose, insulin, fructosamine, CRP, IL-6, and adiponectin	Flaxseed intake decreased glucose and insulin and improved insulin sensitivity	Not mentioned
77	Malin, S. K.	2019	A Whole-Grain Diet Increases Glucose-Stimulated Insulin Secretion Independent of Gut Hormones in Adults at Risk for Type 2 Diabetes	United States	double-blind crossover randomized controlled trial	13	prediabetic adults	24-26 weeks	37.2 ± 1.8 years	No	isocaloric-matched whole grain diet	Refined grain diets	Body Composition, Plasma Glucose, Insulin, and C-peptide, Pancreatic Function, Gut Hormones	A WG-rich diet increases β-cell function independent of gut hormones in adults with prediabetes.	Not mentioned
78	McDonald, J. D.	2018	Replacing carbohydrate during a glucose challenge with the egg white portion or whole eggs protects against postprandial impairments in vascular endothelial function in prediabetic men by limiting increases in glycaemia and lipid peroxidation	United States	randomised, cross-over study	20	prediabetic men	4 x 7 days	31·9 ± 1.6 years	No	75 g glucose with 1·5 whole eggs (EGG), seven egg whites (WHITE) or two egg yolks (YOLK)	isoenegertic meals (1674 k (400 kcal)) containing 100 g glucose (GLU)	brachial artery flow-mediated dilation (FMD), plasma glucose, insulin, cholecystokinin (CCK), lipids (total, LDL- and HDL-cholesterol; TAG), F2-isoprostanes normalised to arachidonic acid (F2-IsoPs/AA), and methylglyoxal	Replacing a portion of a glucose challenge with whole eggs or egg whites, but not yolks, limits postprandial impairments in VEF by attenuating increases in glycaemia and lipid peroxidation.	No adverse effect
79	McDonald, J. D.	2019	Dairy milk proteins attenuate hyperglycemia-induced impairments in vascular endothelial function in adults with prediabetes by limiting increases in glycemia and oxidative stress that reduce nitric oxide bioavailability	United States	randomised, cross-over study	23	adults with prediabetes	4 x 3 days	33.0 ± 1.9 years	No	473 mL of non-fat dairy milk (MILK) or isonitrogenous (16.5 g) amounts of whey (WHEY) or casein (CASEIN) in 473 mL of water	glucose (75 g, GLU) alone	brachial artery flow-mediated dilation (FMD), measured biomarkers of glycemic control, oxidative stress, and NO• homeostasis,	Dairy milk lowers cardiovascular disease risk.	No adverse effect
80	McDonald, J. D.	2018	Co-ingestion of whole eggs or egg whites with glucose protects against postprandial hyperglycaemia-induced oxidative stress and dysregulated arginine metabolism in association with improved vascular endothelial function in prediabetic men	United States	randomised, cross-over study	20	Prediabetic men	28 days	25–50 years	No	75 g glucose with 1·5 EGG, seven WHITE or two egg yolks (YOLK)	isoenergetic meals containing 100 g glucose (GLU)	plasma NO∙ metabolites, the lipid peroxidation biomarker malondialdehyde, antioxidants, arginine and its methylated metabolites (asymmetric dimethylarginine and symmetric dimethylarginine), tetrahydrobiopterin redox status, vasoconstrictors and inflammatory markers	Vasoprotection mediated by EGG and WHITE likely occurs in an NO-dependent manner by improving arginine metabolism and attenuating oxidative stress that otherwise limit NO∙ biosynthesis and bioavailability to the vascular endothelium.	Not mentioned
81	McDonald, J. D.	2019	Dairy milk, regardless of fat content, protects against postprandial hyperglycemia-mediated impairments in vascular endothelial function in adults with prediabetes by limiting oxidative stress responses that reduce nitric oxide bioavailability	United States	RCT	22	adults with prediabetes	180 minutes	31.7±1.8 years	No	glucose with an equal volume of nonfat dairy milk (NFM) or full-fat dairy milk (FFM)	glucose (75 g) dissolved in 473 ml of water (GLU)	Vascular endothelial function and plasma biomarkers, brachial artery FMD responses, NO• metabolites, Glucose, insulin and lipids, Oxidative stress responses, ARG metabolism and BH4 redox status	Dairy milk, regardless of its fat content, attenuates PPH-mediated impairments in VEF by limiting oxidative stress. This improves NO• bioavailability to the vascular endothelium by increasing arginine availability and limiting competitive inhibition on NO• biosynthesis by asymmetric dimethylarginine.	No adverse effect
82	Mehrotra, A.	2014	Bioavailability of vitamin D2 from enriched mushrooms in prediabetic adults: a randomized controlled trial	United States	RCT	43	prediabetic, D-deficient adults	16 weeks	49 ± 12 years	No	UVB-treated mushrooms initially containing: 600 IU D2 or 4000 IU D2; each one also received one capsule of placebo daily	untreated mushrooms and D3 dietary supplements at two label doses: 600 IU D3 and 4000 IU D3	Primary outcome: Vitamin D content of D3 and placebo capsules Secondary outcome: serum calcium, lipids, insulin, HbA1c, hsCRP and PTH	Unanticipated D2 cooking loss from fresh UVB mushrooms and probable low absorption and/or hydroxylation may explain the smaller increase in 25OHD2 in our prediabetic overweight/obese cohort. Moreover, no dose or vitamin D source was associated with modifying T2D risk factors.	Not mentioned
83	Nunez Lopez, Y. O.	2017	Circulating levels of miR-7, miR-152 and miR-192 respond to vitamin D supplementation in adults with prediabetes and correlate with improvements in glycemic control	Boston	single center, 2-by-2 factorial, double-blind, placebo-controlled randomized trial	42	Prediabetic adult	4 months	59 years	No	2,000 units of cholecalciferol daily	placebo	post-treatment 25(OH)D levels, HbA1c, miR-7 levels, miR-152 levels, miR-192 levels	Plasma levels of miR-7 were reduced in the vitamin D and increased in the placebo group. The change in miR-152 positively correlated with the change in levels of the circulating metabolite 25-hydroxyvitamin D (r=0.33, P=0.046) and negatively correlated with the change in HbA1c (r= -0.37, P=0.024). The change in miR-192 positively correlated with the change in fasting glucose (r=0.41, P<0.011). In…	Not mentioned
84	Parker, A. R.	2014	The Effect of Medical Nutrition Therapy by a Registered Dietitian Nutritionist in Patients with Prediabetes Participating in a Randomized Controlled Clinical Research Trial	United States	Prospective, randomized, parallel group study	76	adults with impaired fasting plasma glucose or an HbA1c of 5.7% to 6.4%	12 weeks	Intervention: 51.12 ± 12.36 Control: 49.61 ± 15.61	Yes	medical nutrition therapy by registered dietician nutritionist (carbohydrate and monounsaturated fat intake providing 60% to 70% of energy intake, protein accounting for 15% to 20%, saturated fat intake <7% of total calories, and intake of trans fat to be minimized)	usual care	Primary outcome measure: fasting plasma glucose. Secondary outcome measures: HbA1c, serum lipid levels, and Diabetes Risk Score	Individualized MNT is effective in decreasing HbA1c level in patients diagnosed with prediabetes	Not mentioned
85	Rhee, Y.	2011	Flaxseed supplementation improved insulin resistance in obese glucose intolerant people: a randomized crossover design	United States	randomized crossover trial	11	obese glucose intolerant adult	12 weeks with a 4-week washout period	54.7 ± 6.6 years	No	40 g ground flaxseed	40 g wheat bran	Plasma inflammation biomarkers (CRP, TNF-a, and IL-6), glucose, insulin, and thiobaribituric acid reactive substance (TBARS)	The results of the study weakly support that decreased insulin resistance might have been secondary to antioxidant activity of flaxseed. However, the mechanism(s) of decreased insulin resistance by flaxseed should be further determined using flaxseed lignan.	Not mentioned
86	Sutton, E. F.	2018	Early Time-Restricted Feeding Improves Insulin Sensitivity, Blood Pressure, and Oxidative Stress Even without Weight Loss in Men with Prediabetes	United States	randomized, crossover trial	12	Prediabetic men	5 weeks	56 ± 9 years	No	early time-restricted feeding (eTRF) 3 meals in 6 hours	control schedule (3 meals in 12-hr eating period)	primary endpoints were glucose tolerance, postprandial insulin, and insulin sensitivity secondary endpoints were cardiovascular risk factors and markers of inflammation and oxidative stress	eTRF improves some aspects of cardiometabolic health and that IF’s effects are not solely due to weight loss	- vomiting - frequent urination - drowsiness - headaches - increased thirst - diarrhea
87	Wang, B.	2013	Effects of a whole rice diet on metabolic parameters and inflammatory markers in prediabetes	United States	RCT	100	Chinese American with screening pre-diabetes	3 months	Whire rice: 50 ± 9 Brown rice: 55 ± 9	No	brown rice	white rice	Anthropometric parameters, blood pressure, Glycemic control, insulin resistance, leptin, adiponectin and blood lipids, Circulating AGEs and other markers of oxidative stress and inflammation	Substituting brown rice for white rice in a pre-diabetes population with high daily consumption of rice has a very beneficial effect in improving their metabolic risk factors	Not mentioned
88	Weinhold, Kellie R.	2015	A randomized controlled trial translating the diabetes prevention program to a university worksite, Ohio, 2012-2014. [References]	United States	randomized pretest–posttest trial	69	Prediabetic employee at worksite	16 weeks intervention with 3 months follow up	Intervention: 51.6 ± 9.5 Control: 51.0 ± 8.1	Yes	Lifestyle intervention (low fat intake and PA)	usual care	primary outcome: percentage weight change secondary outcomes: anthropometric measures (height, waist circumference), clinical measures (glucose, blood lipids, blood pressure), dietary intake, and PA levels	The worksite intervention improved metabolic and behavioral risk factors among employees with prediabetes.	Not mentioned
89	Wien, M.	2010	Almond consumption and cardiovascular risk factors in adults with prediabetes	United States	Randomized parallel-group trial	65	prediabetic adult	16 weeks	Intervention: 53 ± 9 Control: 54 ± 11	Yes	dietary modification featuring an ADA diet containing 20% of energy from almonds (approximately 2 oz per day)	Nut free	fasting glucose, insulin, total cholesterol (TC), low-density lipoprotein cholesterol (LDL-C), high-density lipoprotein cholesterol (HDL-C), triglycerides, change in body weight, BMI, waist circumference (WC), and blood pressure (BP)	An ADA diet consisting of 20% of calories as almonds over a 16-week period is effective in improving markers of insulin sensitivity and yields clinically significant improvements in LDL-C in adults with prediabetes.	Not mentioned
90	Tippens, K. M.	2019	Impact of a Short-Term Naturopathic Whole-Foods-Based Nutrition Education Intervention on Dietary Behavior and Diabetes Risk Markers: A Pilot Study	United States	nonrandomized pre–post intervention design	45	adults with or at risk for prediabetes	12 weeks with follow up at 6 and 12 months	50.5 years	Yes	Twelve weekly 90-min workshops emphasizing the health benefits of a naturopathic whole foods diet and including collective meal preparation and communal dining (emphasize plant-based foods as well as meat, poultry, fish, eggs, and whole, and minimally processed, dairy foods with an emphasis on portion size)	-	primary outcome: high-sensitivity Creactive protein (hs-CRP), a biomarker of inflammation secondary outcome: hemoglobin A1c (HbA1c), serum lipids (total cholesterol, high-density lipoprotein [HDL], low-density lipoprotein [LDL], and triglycerides), insulin, and glucose after a 12-h fast	this naturopathic nutrition education series may promote dietary behavior change with associated changes in clinical biomarkers.	Not mentioned
91	Davidson, M.B.	2012	High-Dose Vitamin D Supplementation in People With Prediabetes and Hypovitaminosis D	United States	RCT	117	adults with prediabetes and hypovitaminosis D	1 year	Intervention: 52.3 ±8.0 Control: 52.5 ±7.0	No	vitamin D	placebo	glycemic indices, BMIs, FPG, 2-h glucose, insulin secretion, two indices of insulin sensitivity, A1C level	n individuals with prediabetes and hypovitaminosis D, doses of vitamin D supplementation designed to raise serum 25-OHD levels into the upper-normal range for 1 year had no effect on insulin secretion, insulin sensitivity, or the development of diabetes compared with placebo administration	Not mentioned
92	Mitri, J	2012	Effects of vitamin D and calcium supplementation on pancreatic b cell function, insulin sensitivity, and glycemia in adults at high risk of diabetes: the Calcium and Vitamin D for Diabetes Mellitus (CaDDM) randomized controlled trial	United States	2-by-2 factorial-design, double-masked, placebo-controlled trial	92	adults with glucose intolerance or early diabetes	16 weeks	57.0 years	No	cholecalciferol (2000 IU once daily)	calcium carbonate (400 mg twice daily)	Primary outcome: the change in pancreatic b cell function Other outcomes: acute insulin response, insulin sensitivity, and measures of glycemia	In adults at risk of type 2 diabetes, short-term supplementation with cholecalciferol improved b cell function and had a marginal effect on attenuating the rise in Hb A1c.	28 adverse events (details not revealed)
93	Stentz, F.B.	2016	Remission of pre-diabetes to normal glucose tolerance in obese adults with high protein versus high carbohydrate diet: randomized control trial	United States	RCT	24	pre-diabetes women and men	6 months	43.1±1.3 years	No	High protein (30% protein, 30% fat, 40% carbohydrate; n=12)	High Carbohydrate (15% protein, 30% fat, 55% carbohydrate; n=12)	2-hour OGTTs and MTTs, HOMA IR and insulin sensitivity index, cardiovascular risk factors, inflammatory cytokines, oxidative stress	100% remission of pre-diabetes with a HP diet and significant improvement in metabolic parameters and anti-inflammatory effects compared with a HC diet at 6 months	Not mentioned
94	Harris, S.S.	2012	A Randomized, Placebo-Controlled Trial of Vitamin D Supplementation to Improve Glycaemia in Overweight and Obese African Americans	United States	randomized, placebo-controlled trial	89	overweight or obese African Americans with prediabetes or early diabetes	12 weeks	Intervention: 57.0 ± 10.4 Placebo: 56.3 ± 12.3	No	4000 IU/day vitamin D3	Placebo	Primary outcome: insulin secretion rate (ISR), the Matsuda insulin sensitivity index (MISI) and plasma glucose at the 2-h time point of the OGTT Other outcomes: disposition index, the insulinogenic index (IG-index), the homeostasis model analysis insulin resistance index (HOMA-IR)	Supplementation with 4000 IU/day vitamin D3 successfully corrected vitamin D insufficiency and had divergent effects on insulin secretion and sensitivity with no overall effect on disposition index or glycaemia.	Not mentioned
95	Park, E	2016	A dose–response evaluation of freeze-dried strawberries independent of fiber content on metabolic indices in abdominally obese individuals with insulin resistance in a randomized, single-blinded, diet-controlled crossover trial	United States	randomized controlled, four-arm, dose–response, crossover trial	21	obese individuals with IR	14 days	39.8 ± 13.8 years	No	high-carbohydrate, high-fat meal with beverages containing 10, 20, or 40 g FDS, controlled for fiber	high-carbohydrate, high-fat meal with beverages containing 0 g freeze-dried whole strawberry powder (0g FDS, control),	postprandial plasma glucose, insulin, triglyceride responses, postprandial plasma Ox-LDL and antioxidant capacity and IL-6,	The data support a role of strawberries in improving insulin sensitivity in people with IR	No adverse effect
96	Stull, A.J.	2010	Bioactives in Blueberries Improve Insulin Sensitivity in Obese, Insulin-Resistant Men and Women	California	double-blinded, randomized, and placebo-controlled clinical study	32	obese, nondiabetic, and insulin-resistant subjects	6 weeks	Intervention: 54 ± 3 Control: 49 ± 3	No	smoothie containing 22.5 g blueberry bioactives twice daily	smoothie of equal nutritional value without added blueberry bioactives twice daily	insulin sensitivity, inflammatory biomarkers, lipid profile, and blood pressure	daily dietary supplementation with bioactives from whole blueberries improved insulin sensitivity in obese, nondiabetic, and insulin-resistant participants	Not mentioned
97	Ali, A	2010	Chromium Effects On Glucose Tolerance And Insulin Sensitivity In Persons At Risk For Diabetes Mellitus	United States	randomized, double-blind, placebo-controlled	60	Adult patients with impaired fasting glucose, impaired glucose tolerance, or metabolic syndrome	12 months	56.9 ± 12.1 years	No	chromium picolinate	Placebo	Primary outcome: change in fasting plasma glucose, 2-hour plasma glucose during oral glucose tolerance testing, fasting and 2-hour insulin, and homeostasis model assessment of insulin resistance (HOMA-IR) Secondary outcomes: anthropometric measures, blood pressure, endothelial function, hemoglobin A1c, lipids, and urinary microalbumin	Chromium supplementation does not appear to ameliorate insulin resistance or impaired glucose metabolism in patients at risk for type 2 diabetes and thus is unlikely to attenuate diabetes risk	No serious adverse effect
98	Solomon, T.P.J.	2010	A low–glycemic index diet combined with exercise reduces insulin resistance, postprandial hyperinsulinemia, and glucose-dependent insulinotropic polypeptide responses in obese, prediabetic humans	United States	RCT	21	obese, prediabetic adult	12 weeks	66 ± 1 years	Yes	a low-GI diet	a high-GI diet	Body composition, Blood biochemistry, Insulin sensitivity, Oral glucose–induced metabolic responses, Oral glucose–induced insulin secretion,	Although lifestyle-induced weight loss improves insulin resistance in prediabetic individuals, postprandial hyperinsulinemia is reduced only when a low-GI diet is consumed. In contrast, a high-GI diet impairs pancreatic b cell and intestinal K cell function despite significant weight loss.	No adverse effect
99	Noll, C.	2015	Seven-Day Caloric and Saturated Fat Restriction Increases Myocardial Dietary Fatty Acid Partitioning in Impaired Glucose-Tolerant Subjects	Canada	RCT	15	IGT adult	7 days (3-4 weeks of washout period before)	ISOCAL: 57.6±1.7 years	No	Hypocaloric diet (-500 kcal/d) low in saturated fat (<7% of energy) (LOWCAL study)	an isocaloric diet (ISOCAL; 0 % alcohol, 17 % proteins, 50 % carbohydrates and 33 % fats – 34 % saturated fat, 66 % mono-unsaturated fat and poly-unsaturated fat	left ventricular volumes, function, blood flow index and oxidative metabolism lindex, Postprandial plasma glucose, insulin, C-peptide, non-esterified fatty acids (NEFA), triglycerides and chylomicron-TG, weight, BMI, waist circumference, lean mass, non lean mass, matsuda index, energy expenditure, fasting glucose, fasting insulin, fasting NEFA, fasting TG, fasting leptin, fasting adiponectin, AUC…	Very short-term caloric and saturated fat dietary restriction does not lead to the same changes in organ-specific DFA metabolism than those associated with weight loss in IGT	Not mentioned
100	Paquette, M.	2017	Strawberry and cranberry polyphenols improve insulin sensitivity in insulin-resistant, non-diabetic adults: a parallel, double-blind, controlled and randomised clinical trial	Canada	parallel, double-blind, controlled and randomised clinical trial	41	overweight or obese (BMI≥25 kg/m2) and insulin resistant	6 weeks	Intervention: 57 Control: 60	No	strawberry and cranberry polyphenols (SCP) beverage daily for 6 weeks	flavour-matched Control beverage that contained 0mg SCP daily for 6 weeks	Anthropometric measurements and blood pressure, Insulin sensitivity and other parameters of glucose homoeostasis, Lipid profile, Inflammatory, thrombogenic and oxidative markers, Phenolic composition and bioavailability of experimental beverages	A 6-week dietary intervention with 333 mg of polyphenols from strawberries and cranberries improved insulin sensitivity in overweight and obese non-diabetic, insulin-resistant human subjects but was not effective in improving other cardiometabolic risk factors	No major adverse effect
101	Da Costa, T. H. M.	2014	Improved metabolic response after 16 weeks of calorie-restricted low-glycaemic index diet and metformin in impaired glucose tolerance subjects	Brazil	Non-randomized clinical trial	16	Overweight / obese adults with impaired glucose tolerance	16 weeks	34.6 ± 7.0	Yes	Metformin (1 g/day) and dietary prescription for low-glycaemic index diet with energy reduction of 25-30% their total energy expenditure	-	Glucose metabolism, lipid profile, anthropometric and body composition, and food intake parameters	There were significant reductions in anthropometric and body composition parameters, decrease in HOMA2-%β and triglycerides concentrations, and increase in Cederholm index, indicating enhanced peripheral insulin sensitivity and preservation of pancreatic beta-cell function.	Not mentioned
102	Velázquez-López, L.	2013	Low calorie and carbohydrate diet: To improve the cardiovascular risk indicators in overweight or obese adults with prediabetes	Mexico	Pre-post study	86	patients with obesity and prediabetes	12 months	49 ± 10.04 years	Yes	Nutritional intervention (The proportion of carbohydrates was reduced to 50 % and protein intake was recommended at 20 % with a suggested consumption of both animal and plant origin. As concerns fat, distribution was equal or less than 30 % of the total caloric intake. Ten percent was assigned to saturated fatty acids and 20 % to monounsaturated and polyunsaturated fatty acids. Fiber intake follo…	-	Body weight, fat mass, and lean mass, Glucose, total cholesterol, high density lipoprotein cholesterol and low density cholesterol, and triglycerides, blood pressure	The restrictions in the calorie and carbohydrate diet decrease the cardiovascular risk indicators in overweight or obese adults with prediabetes	Not mentioned
103	Alaei Shahmiri, F	2013	High-dose thiamine supplementation improves glucose tolerance in hyperglycemic individuals: a randomized, double-blind cross-over trial	Australia	randomized, double-blind trial	12	hyperglycemic subjects (10 cases of impaired glucose tolerance and 2 new cases of type 2 diabetes)	6 weeks	57.16 ± 12.88 years	No	thiamine capsules (3 9 100 mg/day)	Placebo	Primary outcome: changes in 2-h plasma glucose. Other outcomes: Fasting plasma glucose and insulin, 2-h plasma insulin, the hemostatic model assessment of insulin resistance (HOMA-IR), renal function measurement and thiamin status	High-dose thiamine supplementation may prevent or slow the progression of hyperglycemia toward diabetes mellitus in individuals with impaired glucose regulation.	No adverse effect
104	Alaei-Shahmiri, F.	2015	The impact of thiamine supplementation on blood pressure, serum lipids and C-reactive protein in individuals with hyperglycemia: a randomised, double-blind cross-over trial	Australia	Randomised, double-blind, cross-over study	12	10 cases of IGT and 2 new cases of T2DM	6 weeks	29–71 years	No	Thiamine hydrochloride capsules (3 _x0002_x 100 mg/day)	Placebo	Anthropometric measurements, systolic and diastolic blood pressure (SBP and DBP), serum cholesterol, triglyceride, HDLcholesterol, LDL-cholesterol, hs-CRP and thiamine status	Mean arterial pressure and SBP were lower in the thiamine arm. No significant change in other parameters	No adverse effect
105	Kim, Y.	2016	Differential Effects of Red Meat/Refined Grain Diet and Dairy/Chicken/Nuts/Whole Grain Diet on Glucose, Insulin and Triglyceride in a Randomized Crossover Study	Australia	Randomized, controlled, crossover trial	51	Adults with NGT (n=17) and IFG/IGT (n=34)	11 weeks	35.1 _x0006_± 15.6	No	Red meat/refined grain meal or a dairy/chicken/nuts/wholegrain meal	-	Plasma glucose, serum TG, serum insulin and C-peptide	The red meat/refined grain diet increased glucose and insulin responses compared with the dairy/chicken/nuts/whole grain diet.	Not mentioned
106	Orazio, L. K.	2011	Evaluation of dietetic advice for modification of cardiovascular disease risk factors in renal transplant recipients	Australia	Randomized controlled trial	102	Adult renal transplant recipients (RTR) with abnormal glucose tolerance (AGT)	2 years	Intervention: 54.9 ± 9.9 Control: 54.7 ± 11.8	Yes	regular consultations with the dietitian and multidisciplinary team: dietary advice (nutrition therapy using a Mediterranean-style (,30% total energy from fat), low glycemic index diet)	standard care	Dietary intake, physical activity (PA) levels, cardiorespiratory fitness (CF), and anthropometry	Dietary advice can contribute to healthier eating habits and a trend for weight loss in RTR with AGT	Not mentioned
107	Parr, E. B.	2018	Impact of First Meal Size during Prolonged Sitting on Postprandial Glycaemia in Individuals with Prediabetes: A Randomised, Crossover Study	Australia	RCT	13	adults with overweight/obesity and prediabetes	24 hours	60 ± 6 years	No	Low-Energy Breakfast (LE-BF: 20%/30%/50% energy intake)	High-Energy Breakfast (HE-BF; breakfast: 50%, lunch: 30%, dinner: 20% energy intake)	glycemic control, Insulin, C-Peptide and tGLP-1,	During periods of prolonged sitting, adults with prediabetes may have more beneficial postprandial insulin responses to a low-energy first meal	Not mentioned
108	Wilson, R.	2018	SunGold Kiwifruit Supplementation of Individuals with Prediabetes Alters Gut Microbiota and Improves Vitamin C Status, Anthropometric and Clinical Markers	New Zealand	Intervention trial	26	Prediabetic adult	12 weeks	66 ± 9 years	No	two SunGold kiwifruit per day	-	glycaemic indices, plasma vitamin C concentrations, hormones, lipid profiles and high-sensitivity C-reactive protein and faecal microbiota composition	Supplementation with two SunGold kiwifruit per day significantly increased plasma vitamin C concentrations and provided small improvements in several markers of metabolic and cardiovascular health.	Not mentioned
109	Christensen, P.	2018	Men and women respond differently to rapid weight loss: Metabolic outcomes of a multi-centre intervention study after a low-energy diet in 2500 overweight, individuals with pre-diabetes (PREVIEW)	Europe (Denmark, Finland, UK, the Netherlands, Spain, Bulgaria), Australia and New Zealand	Ongoing 3-year multicentre, 2-by-2 factorial, randomized controlled trial	2224	Overweight adults with pre-diabetes	Phase 1: 8 weeks	25-70 years	Yes	Low-energy diet (3.4 MJ/810 kcal/daily)	-	Changes in insulin resistance, fat mass, fat-free mass and metabolic syndrome Z-score	Weight loss was 16% greater in men than in women but improvements in insulin resistance were similar.	- constipation - diarrhoea - having a cold/ influenza - sorethroat - dizziness - headache and migraine - muscular weakness and pain - allergic reaction - hair loss - changes in menstrual symptoms - various infection - dry skin, eczema and other effects on skin - gout - other
110	Drummen, M.	2018	Associations of Brain Reactivity to Food Cues with Weight Loss, Protein Intake and Dietary Restraint during the PREVIEW Intervention	Europe (Denmark, Finland, UK, the Netherlands, Spain, Bulgaria), Australia and New Zealand	Multi-centre, 2 × 2 factorial, randomised trial	27	Overweight/obese individuals with impaired fasting glucose and/or impaired glucose tolerance	2 years	53.6 ± 10.3	No	Moderate protein (MP) group with 15/55/30% of energy from protein/carbohydrate/fat	Moderate dietary glycaemic index (GI) and a high protein (HP) group with 25/45/30% of energy from protein/carbohydrate/fat	Brain reactivity and possible relationships with protein intake, anthropometrics, insulin resistance and eating behaviour	Changes in food reward-related brain activation were inversely associated with protein intake and dietary restraint during weight maintenance after weight loss and positively associated with changes in body weight and body-fat percentage.	Not mentioned
111	Moller, G.	2018	Higher Protein Intake Is Not Associated with Decreased Kidney Function in Pre-Diabetic Older Adults Following a One-Year Intervention-A Preview Sub-Study	Europe (Denmark, Finland, UK, the Netherlands, Spain, Bulgaria), Australia and New Zealand	large multi-center randomized controlled trial	309	patients above 55 years	3 years	61.4 ± 4.5	No	high-protein, low-glycemic index (GI) diet	a moderate protein, medium-GI diet	kidney function markers: creatinine clearance, estimated glomerular filtration rate (eGFR), urinary albumin/creatinine ratio (ACR), urinary urea/creatinine ratio (UCR), serum creatinine, and serum urea before and after adjustments for potential confounders	no indication of impaired kidney function after one year with a higher protein intake in pre-diabetic older adults.	Not mentioned
